# Supplementary material for: Increased Reactive Oxygen Species Formation and Oxidative Stress in Rheumatoid Arthritis
Source: PubMed Central journal article supplement (PMC4820274; doi:10.1371/journal.pone.0152925), 2016-04-04
Supplement: pone.0152925.s001.pdf [file pone.0152925.s001.pdf]

**Table A. Biochemical parameters of all the controls included in the study**

|    | <b>MDA<br/>(nmol/ml)</b> | <b>Carbonyl<br/>(nmoles/mg<br/>protein)</b> | <b>T-SH<br/>(<math>\mu</math>M)</b> | <b>Tail<br/>length<br/>(<math>\mu</math>m)</b> | <b>FRAP<br/>(<math>\mu</math>M)</b> | <b>%<br/>quenching<br/>of DPPH</b> | <b>NO<br/>(<math>\mu</math>M)</b> | <b>VITC<br/>(mg/dl)</b> | <b>GSH<br/>(nmoles/mg<br/>Hb)</b> | <b>SOD<br/>(U/mg<br/>Hb)</b> | <b>Catalase<br/>(U/mg<br/>Hb)</b> | <b>GR<br/>(U/g<br/>Hb)</b> | <b>GST<br/>(U/mg<br/>Hb)</b> |
|----|--------------------------|---------------------------------------------|-------------------------------------|------------------------------------------------|-------------------------------------|------------------------------------|-----------------------------------|-------------------------|-----------------------------------|------------------------------|-----------------------------------|----------------------------|------------------------------|
| 1  | 1.33                     | 0.98                                        | 448.9                               | 3.5                                            | 734.67                              | 60.7                               | 12.34                             | 0.8                     | 3.66                              | 1.74                         | 10.04                             | 4.36                       | 0.52                         |
| 2  | 1.026                    | 0.97                                        | 469                                 | 4.2                                            | 818.48                              | 61.8                               | 10.35                             | 1.17                    | 6.42                              | 1.56                         | 10.58                             | 5.27                       | 0.43                         |
| 3  | 0.962                    | 0.84                                        | 527.99                              | 3.6                                            | 865.27                              | 59.5                               | 9.56                              | 1.61                    | 6.57                              | 1.28                         | 10.14                             | 4.84                       | 0.4                          |
| 4  | 0.98                     | 0.76                                        | 420.76                              | 5.4                                            | 915.34                              | 60.1                               | 8.64                              | 1.39                    | 4.2                               | 1.38                         | 11.37                             | 4.01                       | 0.61                         |
| 5  | 1.192                    | 0.93                                        | 482.4                               | 5.2                                            | 906.4                               | 59.4                               | 8.23                              | 0.86                    | 5.46                              | 1.85                         | 11.14                             | 5.11                       | 0.54                         |
| 6  | 0.916                    | 0.94                                        | 360.8                               | 4.2                                            | 711.81                              | 58.1                               | 9.45                              | 1.21                    | 5.9                               | 1.43                         | 10.16                             | 6.02                       | 0.56                         |
| 7  | 0.987                    | 0.96                                        | 417.7                               | 3.6                                            | 796.71                              | 56.2                               | 7.76                              | 0.95                    | 4.33                              | 1.65                         | 10.32                             | 5.35                       | 0.59                         |
| 8  | 0.98                     | 0.82                                        | 534.6                               | 4.5                                            | 865.27                              | 55.4                               | 9.23                              | 0.98                    | 7.39                              | 1.36                         | 11.3                              | 4.54                       | 0.42                         |
| 9  | 1.288                    | 0.84                                        | 427.4                               | 3.7                                            | 718.27                              | 55.3                               | 10.29                             | 1.62                    | 6.57                              | 1.59                         | 12.84                             | 4.5                        | 0.65                         |
| 10 | 1.096                    | 1.06                                        | 415.9                               | 4.1                                            | 901.2                               | 56.8                               | 7.43                              | 1.39                    | 6.16                              | 1.84                         | 12.39                             | 4.19                       | 0.67                         |
| 11 | 1.038                    | 0.96                                        | 368.5                               | 4.9                                            | 807.59                              | 59.1                               | 8.16                              | 1.5                     | 5.9                               | 1.27                         | 11.7                              | 5.78                       | 0.42                         |
| 12 | 1.243                    | 1.02                                        | 512                                 | 3.6                                            | 743.38                              | 54.1                               | 9.92                              | 0.95                    | 4.78                              | 1.36                         | 10.2                              | 4.03                       | 0.57                         |
| 13 | 1.41                     | 0.83                                        | 449.7                               | 3.5                                            | 716.34                              | 55.9                               | 9.39                              | 1.46                    | 4.26                              | 1.28                         | 10.59                             | 4.12                       | 5.54                         |
| 14 | 1.21                     | 0.88                                        | 462.8                               | 4.8                                            | 974.12                              | 60.5                               | 6.37                              | 0.86                    | 3.09                              | 1.47                         | 10.02                             | 4.56                       | 0.59                         |
| 15 | 1.391                    | 0.89                                        | 525.8                               | 4.7                                            | 824.89                              | 57                                 | 7.74                              | 1.02                    | 7.34                              | 1.21                         | 12.94                             | 5.11                       | 0.54                         |
| 16 | 1.326                    | 0.85                                        | 382.5                               | 3.2                                            | 746.86                              | 56.2                               | 5.72                              | 1.15                    | 4.38                              | 1.55                         | 9.84                              | 4.65                       | 0.62                         |
| 17 | 1.224                    | 0.93                                        | 399.6                               | 4                                              | 768.97                              | 58.3                               | 7.48                              | 0.81                    | 4.93                              | 1.37                         | 10.48                             | 5.35                       | 0.66                         |
| 18 | 1.5                      | 1.05                                        | 455.8                               | 3.5                                            | 856.2                               | 55.1                               | 8.59                              | 0.86                    | 6.98                              | 1.59                         | 10.62                             | 5.59                       | 0.56                         |
| 19 | 1.467                    | 0.98                                        | 536.9                               | 3.7                                            | 912.56                              | 56.9                               | 6.39                              | 1.25                    | 5.14                              | 1.57                         | 11.7                              | 6.43                       | 0.54                         |
| 20 | 1.051                    | 1.09                                        | 432.8                               | 4.5                                            | 765.97                              | 58.2                               | 5.27                              | 0.98                    | 6.38                              | 1.42                         | 11.3                              | 4.34                       | 0.53                         |
| 21 | 1.108                    | 0.96                                        | 476.5                               | 4.1                                            | 816.45                              | 62.5                               | 7.43                              | 1.14                    | 7.34                              | 1.57                         | 11.71                             | 4.19                       | 0.59                         |
| 22 | 1.083                    | 0.93                                        | 375.9                               | 3.8                                            | 785.48                              | 56.7                               | 10.49                             | 0.84                    | 4.32                              | 1.59                         | 11.81                             | 5.43                       | 0.6                          |
| 23 | 1.339                    | 0.94                                        | 512.8                               | 3.4                                            | 915.86                              | 59.8                               | 6.94                              | 0.86                    | 4.85                              | 1.38                         | 10.32                             | 6.13                       | 0.57                         |

|    |       |      |        |     |        |      |       |      |      |       |       |      |      |
|----|-------|------|--------|-----|--------|------|-------|------|------|-------|-------|------|------|
| 24 | 1.704 | 0.85 | 527.8  | 3.2 | 753.26 | 54.3 | 7.36  | 0.97 | 7.39 | 1.49  | 10.89 | 4.19 | 0.53 |
| 25 | 1.019 | 0.89 | 487.9  | 4.1 | 901.2  | 55.8 | 8.21  | 0.66 | 6.05 | 1.27  | 9.37  | 4.24 | 0.58 |
| 26 | 1.23  | 0.9  | 468    | 4.9 | 821.52 | 57.9 | 9.15  | 0.9  | 5.8  | 1.79  | 12.64 | 5.23 | 0.52 |
| 27 | 1.256 | 0.68 | 377.4  | 5.1 | 843.97 | 59.8 | 6.32  | 1.16 | 7.39 | 1.35  | 12.43 | 4.16 | 0.64 |
| 28 | 1.346 | 0.95 | 520.8  | 4.5 | 715.32 | 58.3 | 5.49  | 0.95 | 4.69 | 1.28  | 11.79 | 6.23 | 0.47 |
| 29 | 1.032 | 1.08 | 476.9  | 3.6 | 843.97 | 58.4 | 7.43  | 0.74 | 4.28 | 1.73  | 12.86 | 4.53 | 0.54 |
| 30 | 1.294 | 0.83 | 449.5  | 3.7 | 768.65 | 59.6 | 8.39  | 0.94 | 7.28 | 1.36  | 11.42 | 4.56 | 0.42 |
| 31 | 1.577 | 0.89 | 454.9  | 3.8 | 821.32 | 57.5 | 10.95 | 0.83 | 5.17 | 1.42  | 9.27  | 4.34 | 0.68 |
| 32 | 1.62  | 0.8  | 398.9  | 3.4 | 939.29 | 59.7 | 9.5   | 1.17 | 6.87 | 1.37  | 10.91 | 6.02 | 0.68 |
| 33 | 1.57  | 0.92 | 532    | 4.8 | 896.34 | 58.6 | 6.5   | 0.81 | 4.38 | 1.48  | 10.63 | 4.32 | 0.51 |
| 34 | 1.224 | 0.74 | 386.4  | 4.2 | 784.23 | 60.4 | 8.64  | 1.16 | 4.85 | 1.118 | 11.42 | 4.57 | 0.55 |
| 35 | 0.98  | 0.91 | 376.2  | 3.1 | 716.24 | 61.3 | 7.34  | 0.96 | 5.63 | 1.56  | 11.3  | 6.16 | 0.57 |
| 36 | 1.326 | 0.97 | 390.3  | 3   | 906.64 | 60.9 | 8.33  | 0.82 | 3.32 | 1.5   | 9.45  | 4.32 | 0.62 |
| 37 | 1.75  | 1.06 | 498.9  | 3.8 | 854.28 | 58.6 | 9.34  | 1.26 | 7.39 | 1.37  | 10.87 | 4.58 | 0.52 |
| 38 | 1.544 | 1.1  | 412.9  | 4.7 | 754.37 | 59.7 | 6.95  | 0.84 | 5.3  | 1.63  | 10.48 | 5.17 | 0.46 |
| 39 | 1.62  | 0.94 | 475.8  | 3.1 | 905.78 | 58.1 | 7.49  | 0.65 | 5.83 | 1.43  | 11.41 | 4.35 | 0.47 |
| 40 | 1.59  | 0.86 | 487    | 3.6 | 865.38 | 55.7 | 6.94  | 1.23 | 4.16 | 1.21  | 11.83 | 4.87 | 0.55 |
| 41 | 0.76  | 0.89 | 387.7  | 4.8 | 765.4  | 55.7 | 7.13  | 1.19 | 4.24 | 1.35  | 9.32  | 5.67 | 0.58 |
| 42 | 1.21  | 0.95 | 463.2  | 4.2 | 876.45 | 58.4 | 6.39  | 0.87 | 5.36 | 1.57  | 11.24 | 6.21 | 0.4  |
| 43 | 0.95  | 0.94 | 483.23 | 4.8 | 724.98 | 53.7 | 10.93 | 0.58 | 6.58 | 1.68  | 12.37 | 5.35 | 0.64 |
| 44 | 1.54  | 1.03 | 512.38 | 4.5 | 798.46 | 54.6 | 8.43  | 0.63 | 6.34 | 1.25  | 9.68  | 4.32 | 0.52 |
| 45 | 1.13  | 0.85 | 394.24 | 3.4 | 912.2  | 58.2 | 12.59 | 0.86 | 5.13 | 1.64  | 12.27 | 6.21 | 0.54 |
| 46 | 0.96  | 8.82 | 387.63 | 4.4 | 734.98 | 59.6 | 8.53  | 1.05 | 4.54 | 1.75  | 12.34 | 5.37 | 0.57 |
| 47 | 0.85  | 0.95 | 503.42 | 4.2 | 856.58 | 54.9 | 6.94  | 1.14 | 6.78 | 1.64  | 9.31  | 4.83 | 0.58 |
| 48 | 1.17  | 1.06 | 463.87 | 3.7 | 843.95 | 55.3 | 7.5   | 1.13 | 4.08 | 1.58  | 9.85  | 5.17 | 0.56 |
| 49 | 1.28  | 0.75 | 569.54 | 4.8 | 725.28 | 56.5 | 9.98  | 0.48 | 6.76 | 1.74  | 12.27 | 4.76 | 0.47 |
| 50 | 1.24  | 0.81 | 432.12 | 3.1 | 749.37 | 55.5 | 7.59  | 0.9  | 4.34 | 1.38  | 13.03 | 4.98 | 0.52 |
| 51 | 0.99  | 0.94 | 405.83 | 4.6 | 765.32 | 56.7 | 8.44  | 0.91 | 3.54 | 1.25  | 10.87 | 4.34 | 0.56 |
| 52 | 1.06  | 1.05 | 513.85 | 3.1 | 834.67 | 60.4 | 8.21  | 0.93 | 4.35 | 1.36  | 11.27 | 5.67 | 0.52 |

|    |      |      |        |     |        |      |       |      |      |      |       |      |      |
|----|------|------|--------|-----|--------|------|-------|------|------|------|-------|------|------|
| 53 | 1.19 | 0.94 | 432.84 | 3.6 | 734.56 | 61.9 | 11.84 | 0.54 | 6.57 | 1.34 | 12.64 | 4.21 | 0.57 |
|----|------|------|--------|-----|--------|------|-------|------|------|------|-------|------|------|

**Table B. Biochemical parameters of all the RA patients included in the study**

|    | ROS<br>(% of<br>control) | MDA<br>(nmol/ml) | Carbonyl<br>(nmoles/mg<br>protein) | T-SH<br>( $\mu$ M) | Tail<br>length<br>( $\mu$ m) | FRAP<br>( $\mu$ M) | %<br>quenching<br>of DPPH | NO<br>( $\mu$ M) | VITC<br>(mg/dl) | GSH<br>(nmoles/mg<br>Hb) | SOD<br>(U/mg<br>Hb) | Catalase<br>(U/mg<br>Hb) | GR<br>(U/g<br>Hb) | GST<br>(U/mg<br>Hb) |
|----|--------------------------|------------------|------------------------------------|--------------------|------------------------------|--------------------|---------------------------|------------------|-----------------|--------------------------|---------------------|--------------------------|-------------------|---------------------|
| 1  | 133.6                    | 2.54             | 1.54                               | 324.17             | 7.6                          | 515.9              | 45.6                      | 12.85            | 0.31            | 2.04                     | 0.7                 | 9.14                     | 2.13              | 0.5                 |
| 2  | 168.4                    | 2.76             | 1.59                               | 248.6              | 11.6                         | 502.84             | 45.8                      | 15.57            | 0.53            | 4.28                     | 0.72                | 7.34                     | 2.35              | 0.85                |
| 3  | 168.3                    | 2.692            | 1.59                               | 247.9              | 11.6                         | 506.1              | 43.5                      | 12.68            | 0.54            | 4.38                     | 0.72                | 9.21                     | 2.09              | 0.99                |
| 4  | 164.8                    | 2.621            | 1.53                               | 262.64             | 11.3                         | 526.79             | 45.8                      | 15.04            | 0.57            | 4.56                     | 0.78                | 7.94                     | 2.15              | 0.95                |
| 5  | 164.5                    | 1.993            | 1.49                               | 302.6              | 9.5                          | 564.32             | 48.5                      | 12.85            | 0.3             | 2.78                     | 0.94                | 7.29                     | 2.64              | 0.72                |
| 6  | 164.3                    | 1.801            | 1.48                               | 278.72             | 9.5                          | 614.95             | 50                        | 14.8             | 0.26            | 2.61                     | 0.95                | 9.87                     | 2.38              | 0.68                |
| 7  | 163.2                    | 2                | 1.59                               | 280.4              | 9.4                          | 557.25             | 47.28                     | 14.76            | 0.31            | 2.84                     | 0.95                | 8.47                     | 2.43              | 0.83                |
| 8  | 151.3                    | 1.935            | 1.49                               | 275.14             | 9.4                          | 628.56             | 52.4                      | 14.76            | 0.5             | 3.85                     | 0.96                | 8.48                     | 2.43              | 0.54                |
| 9  | 162.3                    | 2.224            | 1.48                               | 278.75             | 10.3                         | 594.58             | 51                        | 14.83            | 0.33            | 2.97                     | 0.84                | 7.83                     | 2.43              | 0.81                |
| 10 | 161.2                    | 2.73             | 1.55                               | 256.3              | 9.5                          | 539.3              | 46.2                      | 15.84            | 0.21            | 2.12                     | 0.94                | 8.74                     | 2.36              | 0.84                |
| 11 | 159.6                    | 2.32             | 1.47                               | 286.75             | 8.4                          | 568.14             | 46.7                      | 14.83            | 0.29            | 2.73                     | 1.2                 | 7.24                     | 0.54              | 0.76                |
| 12 | 158.9                    | 2.179            | 1.38                               | 292.12             | 8.3                          | 543.87             | 49.6                      | 14.75            | 0.23            | 2.34                     | 1.21                | 7.2                      | 2.35              | 0.85                |
| 13 | 158.9                    | 2.692            | 1.5                                | 270.68             | 12.6                         | 504.54             | 48.6                      | 15.86            | 0.24            | 2.37                     | 0.67                | 9.64                     | 2.29              | 0.87                |
| 14 | 158.9                    | 1.391            | 1.42                               | 276.2              | 8.6                          | 593.22             | 53.4                      | 14.75            | 0.14            | 4.85                     | 1.16                | 7.63                     | 3.12              | 0.52                |

|    |       |       |      |        |      |        |      |       |      |      |      |       |      |      |
|----|-------|-------|------|--------|------|--------|------|-------|------|------|------|-------|------|------|
| 15 | 162.9 | 2.12  | 1.51 | 268.31 | 11.3 | 632.25 | 50.6 | 14.74 | 0.24 | 2.38 | 0.74 | 8.67  | 3.13 | 0.74 |
| 16 | 154.9 | 2.57  | 1.41 | 312.5  | 8.5  | 553.99 | 48.2 | 14.85 | 0.21 | 2.17 | 1.18 | 9.28  | 2.6  | 0.79 |
| 17 | 154.8 | 2.179 | 1.41 | 265.46 | 8.1  | 650.86 | 52.6 | 15.81 | 0.61 | 2.79 | 1.25 | 7.34  | 3.17 | 0.97 |
| 18 | 154.7 | 2.198 | 1.64 | 324.28 | 11.6 | 538.24 | 45.8 | 15.43 | 0.28 | 2.69 | 0.74 | 9.28  | 2.67 | 0.78 |
| 19 | 154.6 | 2.17  | 1.4  | 315.47 | 9.5  | 612.38 | 49.2 | 14.95 | 0.33 | 2.97 | 0.94 | 9.32  | 2.67 | 0.77 |
| 20 | 154.3 | 2.05  | 1.43 | 297.48 | 8.2  | 648.92 | 49.8 | 14.37 | 0.43 | 3.46 | 1.24 | 9.34  | 2.96 | 0.74 |
| 21 | 153.4 | 1.801 | 1.52 | 312.54 | 10   | 672.62 | 48.2 | 15.64 | 0.24 | 2.43 | 0.87 | 7.31  | 3.24 | 0.72 |
| 22 | 153.1 | 1.987 | 1.58 | 254.15 | 9.6  | 510.46 | 46.2 | 15.28 | 0.47 | 3.68 | 0.93 | 8.29  | 3.06 | 0.74 |
| 23 | 152.3 | 1.57  | 1.42 | 304.53 | 7.6  | 654.32 | 52.7 | 14.24 | 0.26 | 2.58 | 1.29 | 9.53  | 3.49 | 0.83 |
| 24 | 152.3 | 2.57  | 1.48 | 278.49 | 9.5  | 535.08 | 50.5 | 14.87 | 0.34 | 3.04 | 0.94 | 10.92 | 3.28 | 0.69 |
| 25 | 158.7 | 2.583 | 1.59 | 247.32 | 11.2 | 513.72 | 46.9 | 15.08 | 0.25 | 2.46 | 0.81 | 7.06  | 3.34 | 0.69 |
| 26 | 149.2 | 2.038 | 1.49 | 276.8  | 10.3 | 514.81 | 47.6 | 15.05 | 0.4  | 3.38 | 0.85 | 9.72  | 3.42 | 0.69 |
| 27 | 148.7 | 2.57  | 1.5  | 269.8  | 9.6  | 588.82 | 49.2 | 14.85 | 0.39 | 3.28 | 0.94 | 8.28  | 3.43 | 0.69 |
| 28 | 148.7 | 2.37  | 1.49 | 273.7  | 9.6  | 537.68 | 48.9 | 14.85 | 0.37 | 3.18 | 0.94 | 8.29  | 3.43 | 0.68 |
| 29 | 148.6 | 1.935 | 1.46 | 286.76 | 8.5  | 518.08 | 47.3 | 14.37 | 0.41 | 3.43 | 1.18 | 8.29  | 3.46 | 0.68 |
| 30 | 148.5 | 1.28  | 1.37 | 329.64 | 11.8 | 628.48 | 54.2 | 13.62 | 0.36 | 3.13 | 1.3  | 9.22  | 4.13 | 0.82 |
| 31 | 147.8 | 1.98  | 1.46 | 287.14 | 7.5  | 612.87 | 49.8 | 14.38 | 0.39 | 3.38 | 1.32 | 7.17  | 3.47 | 0.68 |
| 32 | 147.5 | 2.038 | 1.37 | 268    | 9.8  | 638.64 | 50.8 | 13.67 | 0.32 | 2.84 | 0.9  | 7.1   | 3.26 | 0.72 |
| 33 | 147.5 | 2.179 | 1.64 | 234.1  | 8.9  | 581.21 | 48.4 | 14.38 | 0.29 | 2.74 | 1.14 | 7.37  | 4.03 | 0.58 |
| 34 | 147.2 | 2.403 | 1.52 | 337.68 | 10.6 | 533.32 | 47.8 | 14.25 | 0.21 | 2.12 | 0.83 | 7.63  | 2.12 | 0.72 |

|    |       |       |      |        |      |        |      |       |      |      |       |       |      |      |
|----|-------|-------|------|--------|------|--------|------|-------|------|------|-------|-------|------|------|
| 35 | 146.9 | 2.435 | 1.47 | 284.63 | 10.6 | 561.61 | 46.8 | 14.21 | 0.21 | 2.15 | 0.83  | 7.63  | 2.12 | 0.97 |
| 36 | 146.9 | 2.18  | 1.36 | 343.34 | 10.5 | 631.02 | 50.2 | 13.75 | 0.34 | 3.08 | 0.83  | 7.38  | 3.65 | 0.64 |
| 37 | 146.8 | 1.325 | 1.37 | 327.9  | 9.2  | 582.39 | 52.9 | 13.63 | 0.34 | 3.12 | 1.105 | 7.39  | 2.76 | 0.75 |
| 38 | 145.6 | 1.62  | 1.31 | 359.78 | 8.3  | 647.6  | 55.2 | 15.62 | 0.57 | 4.57 | 1.23  | 8.37  | 4.83 | 0.79 |
| 39 | 145.2 | 2.435 | 1.39 | 322.8  | 10.8 | 568.34 | 48.6 | 14.76 | 0.34 | 3.12 | 0.81  | 9.27  | 2.67 | 0.84 |
| 40 | 143.8 | 2.391 | 1.63 | 246.24 | 9.3  | 551.82 | 47.2 | 13.84 | 0.45 | 3.54 | 1.03  | 10.82 | 2.66 | 0.78 |
| 41 | 143.5 | 2.403 | 1.38 | 324.4  | 9.6  | 568.37 | 46.9 | 13.84 | 0.46 | 3.57 | 0.91  | 7.05  | 2.67 | 0.78 |
| 42 | 143.5 | 2.378 | 1.28 | 367.8  | 9.6  | 535.49 | 48.7 | 13.82 | 0.47 | 3.62 | 0.93  | 11.28 | 2.67 | 0.78 |
| 43 | 143.3 | 1.801 | 1.48 | 356.42 | 9.1  | 590.76 | 47.6 | 13.56 | 0.48 | 3.84 | 1.12  | 7.18  | 2.37 | 0.84 |
| 44 | 142.8 | 2.378 | 1.37 | 334.2  | 10.7 | 563.58 | 48.6 | 13.28 | 0.38 | 3.27 | 0.82  | 7.53  | 4.16 | 0.54 |
| 45 | 142.6 | 2.06  | 1.28 | 365.64 | 10.6 | 607.98 | 49.5 | 13.28 | 0.32 | 2.94 | 0.82  | 7.54  | 2.67 | 1.06 |
| 46 | 142.5 | 1.621 | 1.32 | 358.9  | 9.4  | 564.32 | 52.8 | 14.27 | 0.52 | 4.23 | 0.98  | 8.42  | 2.36 | 0.84 |
| 47 | 142.5 | 2.05  | 1.37 | 332.32 | 8.3  | 568.14 | 48.5 | 15.7  | 0.26 | 2.64 | 1.22  | 7.64  | 3.76 | 0.64 |
| 48 | 142.5 | 2.13  | 1.38 | 324.53 | 8.3  | 574.37 | 49.8 | 14.3  | 0.27 | 2.64 | 1.224 | 7.68  | 3.78 | 0.64 |
| 49 | 142.3 | 1.93  | 1.57 | 375.42 | 10.5 | 616.03 | 53.1 | 14.84 | 0.28 | 2.71 | 0.83  | 7.41  | 2.45 | 0.81 |
| 50 | 142.3 | 2.15  | 1.62 | 265.32 | 10.5 | 559.44 | 45.2 | 14.84 | 0.29 | 2.72 | 0.84  | 7.47  | 2.56 | 0.79 |
| 51 | 142.3 | 2.134 | 1.54 | 262.64 | 9.2  | 555.08 | 50.5 | 15.03 | 0.41 | 3.42 | 1.08  | 7.93  | 2.19 | 0.53 |
| 52 | 141.6 | 2.237 | 1.42 | 305.9  | 9.4  | 528.92 | 48.2 | 14.49 | 0.23 | 2.35 | 0.97  | 9.62  | 2.13 | 0.97 |
| 53 | 138.4 | 1.929 | 1.39 | 321.6  | 6.5  | 626.92 | 52.6 | 14.46 | 0.28 | 2.65 | 1.39  | 9.63  | 2.15 | 0.95 |
| 54 | 137.5 | 1.5   | 1.45 | 292.12 | 8.6  | 635.63 | 53.5 | 13.74 | 0.54 | 4.52 | 1.16  | 7.94  | 2.15 | 0.94 |

|    |       |       |      |        |      |        |      |       |      |      |      |       |      |      |
|----|-------|-------|------|--------|------|--------|------|-------|------|------|------|-------|------|------|
| 55 | 137.2 | 1.46  | 1.39 | 395.6  | 7.7  | 657.89 | 54.8 | 13.36 | 0.47 | 3.62 | 1.26 | 9.38  | 2.29 | 0.87 |
| 56 | 136.9 | 1.891 | 1.21 | 304.15 | 7.7  | 639.03 | 52.8 | 13.29 | 0.51 | 3.95 | 1.26 | 10.71 | 2.31 | 0.87 |
| 57 | 136.8 | 2.038 | 1.42 | 259.96 | 8.5  | 537.25 | 49   | 13.68 | 0.53 | 4.28 | 1.16 | 8.12  | 2.74 | 0.75 |
| 58 | 136.5 | 1.891 | 1.36 | 343.04 | 9.2  | 573.65 | 49.6 | 13.73 | 0.43 | 3.48 | 1.1  | 7.98  | 2.19 | 0.87 |
| 59 | 136.4 | 2.19  | 1.57 | 254.6  | 8.9  | 543.89 | 49.6 | 13.57 | 0.53 | 4.32 | 1.13 | 10.72 | 2.37 | 0.84 |
| 60 | 136.1 | 2.237 | 1.34 | 354.74 | 8.9  | 657.94 | 50.2 | 13.56 | 0.43 | 3.47 | 1.14 | 10.73 | 2.37 | 0.75 |
| 61 | 135   | 1.243 | 1.43 | 298.7  | 7.6  | 703.73 | 56.2 | 13.28 | 0.58 | 4.73 | 1.28 | 10.28 | 4.73 | 0.74 |
| 62 | 134.8 | 2.012 | 1.58 | 375.46 | 10.2 | 696.58 | 52.7 | 14.58 | 0.52 | 4.28 | 0.85 | 10.14 | 2.75 | 0.75 |
| 63 | 134.7 | 1.76  | 1.27 | 385.8  | 8.2  | 633.45 | 52.8 | 15.27 | 0.36 | 3.16 | 1.24 | 8.12  | 2.85 | 0.75 |
| 64 | 134.5 | 1.78  | 1.38 | 324.56 | 7.5  | 543.2  | 54.1 | 14.74 | 0.37 | 3.16 | 1.3  | 10.75 | 3.29 | 0.69 |
| 65 | 134.5 | 1.87  | 1.35 | 348.67 | 8.5  | 654.13 | 52.4 | 14.69 | 0.34 | 2.98 | 1.19 | 10.81 | 2.96 | 0.74 |
| 66 | 134.2 | 1.737 | 1.52 | 267.15 | 8.8  | 707.89 | 52.1 | 13.52 | 0.51 | 3.92 | 1.15 | 8.19  | 2.64 | 0.79 |
| 67 | 134.2 | 1.467 | 1.34 | 353.95 | 7.3  | 719.29 | 54.9 | 13.49 | 0.57 | 4.64 | 1.35 | 8.25  | 3.12 | 0.52 |
| 68 | 134.2 | 2.03  | 1.35 | 347.85 | 9.6  | 538.98 | 47.5 | 15.37 | 0.54 | 4.32 | 1.35 | 8.11  | 3.57 | 0.66 |
| 69 | 134.1 | 1.544 | 1.37 | 332.32 | 7.4  | 687.68 | 54.7 | 12.79 | 0.59 | 4.83 | 1.34 | 9.74  | 4.12 | 0.57 |
| 70 | 172.5 | 1.97  | 1.53 | 340.36 | 8.8  | 682.43 | 53.4 | 14.65 | 0.34 | 3.08 | 1.15 | 8.18  | 3.14 | 0.73 |
| 71 | 133.1 | 1.467 | 1.37 | 334.8  | 8.8  | 648.96 | 50.9 | 14.63 | 0.53 | 4.32 | 1.16 | 10.52 | 3.53 | 0.67 |
| 72 | 132.6 | 1.243 | 1.27 | 376.8  | 7.9  | 728.27 | 52.8 | 13.27 | 0.59 | 4.78 | 1.26 | 10.54 | 4.25 | 0.54 |
| 73 | 132.5 | 1.24  | 1.28 | 376.5  | 7.9  | 602.97 | 53.7 | 13.24 | 0.59 | 4.8  | 1.26 | 8.66  | 4.32 | 0.53 |
| 74 | 132.4 | 1.935 | 1.32 | 357.64 | 7.6  | 698.76 | 52.9 | 15.02 | 0.25 | 2.46 | 1.26 | 8.26  | 2.16 | 0.92 |

|    |       |       |      |        |     |        |      |       |      |      |      |       |      |      |
|----|-------|-------|------|--------|-----|--------|------|-------|------|------|------|-------|------|------|
| 75 | 132.4 | 1.621 | 1.54 | 257.87 | 7.6 | 534.4  | 49.8 | 14.98 | 0.25 | 2.46 | 1.26 | 8.26  | 2.18 | 0.89 |
| 76 | 132   | 1.95  | 1.28 | 249.24 | 9.3 | 521.92 | 45.6 | 14.85 | 0.55 | 4.55 | 1.02 | 8.37  | 3.46 | 0.68 |
| 77 | 131.2 | 1.942 | 1.28 | 368.74 | 9.3 | 685.95 | 52.4 | 14.85 | 0.58 | 4.73 | 1.02 | 8.37  | 3.46 | 0.68 |
| 78 | 129.8 | 1.935 | 1.32 | 358.6  | 8.4 | 785.45 | 50.3 | 15.31 | 0.3  | 2.76 | 1.2  | 8.38  | 3.47 | 0.68 |
| 79 | 129.8 | 1.21  | 1.28 | 376.8  | 7.2 | 687.98 | 54.8 | 14.54 | 0.64 | 4.96 | 1.38 | 8.14  | 2.67 | 0.75 |
| 80 | 129.8 | 1.692 | 1.37 | 328.3  | 7.6 | 625.69 | 50.8 | 15.27 | 0.54 | 4.37 | 1.27 | 8.76  | 3.15 | 0.73 |
| 81 | 128.6 | 1.577 | 1.26 | 387.4  | 7.6 | 581.21 | 53.1 | 15.24 | 0.54 | 4.4  | 1.27 | 8.92  | 3.16 | 0.72 |
| 82 | 128.6 | 1.76  | 1.26 | 387.6  | 7.6 | 585.56 | 52.9 | 15.04 | 0.64 | 4.87 | 1.27 | 8.93  | 3.21 | 0.72 |
| 83 | 128.3 | 1.628 | 1.37 | 332.32 | 7.4 | 594.38 | 53.4 | 14.35 | 0.57 | 4.58 | 1.34 | 10.15 | 3.27 | 0.7  |
| 84 | 127.8 | 1.84  | 1.28 | 254.7  | 7.3 | 584.47 | 44.2 | 14.33 | 0.67 | 5.14 | 0.93 | 10.26 | 3.28 | 0.7  |
| 85 | 126.9 | 1.256 | 1.28 | 376.8  | 7.3 | 734.67 | 56.4 | 13.21 | 0.73 | 5.48 | 1.36 | 8.14  | 3.63 | 0.65 |
| 86 | 126.5 | 1.692 | 1.24 | 392.9  | 8.2 | 587.69 | 51.8 | 14.37 | 0.67 | 5.12 | 1.24 | 10.11 | 2.98 | 0.74 |
| 87 | 126.5 | 1.75  | 1.24 | 393.69 | 8.2 | 632.12 | 52.5 | 14.36 | 0.31 | 2.84 | 1.25 | 10.11 | 2.98 | 0.74 |
| 88 | 126.4 | 1.54  | 1.51 | 269.5  | 8.9 | 615.7  | 52.6 | 12.43 | 0.64 | 4.91 | 1.15 | 8.56  | 3.12 | 0.74 |
| 89 | 126.3 | 1.487 | 1.28 | 367.24 | 9.9 | 684.25 | 52.8 | 12.38 | 0.64 | 4.92 | 0.87 | 8.16  | 2.27 | 0.74 |
| 90 | 125.9 | 1.57  | 1.41 | 315.2  | 7.6 | 637.25 | 50.7 | 14.25 | 0.38 | 3.27 | 1.28 | 9.42  | 3.25 | 0.72 |
| 91 | 125.6 | 1.61  | 1.39 | 321    | 7.6 | 647.6  | 54.2 | 14.25 | 0.61 | 4.86 | 1.29 | 9.42  | 3.26 | 0.72 |
| 92 | 125.6 | 1.737 | 1.39 | 324.28 | 7.5 | 713.43 | 51.6 | 12.48 | 0.65 | 5.12 | 1.3  | 9.45  | 2.95 | 0.74 |
| 93 | 124.9 | 1.85  | 1.14 | 398.8  | 7.5 | 589.45 | 50.1 | 14.62 | 0.45 | 3.51 | 1.31 | 9.48  | 2.94 | 0.88 |
| 94 | 124.9 | 1.23  | 1.57 | 254.6  | 7.2 | 649.76 | 52.8 | 14.84 | 0.68 | 5.25 | 1.38 | 8.98  | 3.82 | 0.64 |

|     |       |       |      |        |     |        |      |       |      |      |      |       |      |      |
|-----|-------|-------|------|--------|-----|--------|------|-------|------|------|------|-------|------|------|
| 95  | 124.8 | 1.339 | 1.27 | 380.98 | 7.2 | 684.57 | 55.5 | 14.56 | 0.71 | 5.27 | 1.38 | 9.15  | 3.85 | 0.63 |
| 96  | 124.5 | 1.27  | 1.44 | 354.87 | 9.2 | 593.18 | 54.8 | 14.36 | 0.71 | 5.29 | 1.06 | 9.16  | 3.95 | 0.59 |
| 97  | 124.3 | 1.628 | 1.26 | 387.9  | 5.9 | 721.23 | 56.4 | 14.36 | 0.72 | 5.39 | 1.5  | 9.16  | 3.87 | 0.62 |
| 98  | 123.5 | 1.43  | 1.25 | 388.6  | 5.8 | 756.8  | 53.4 | 12.65 | 0.72 | 5.42 | 1.54 | 9.18  | 3.94 | 0.62 |
| 99  | 123.4 | 1.342 | 1.25 | 389.5  | 5.6 | 673.25 | 55.1 | 12.56 | 0.72 | 5.43 | 1.54 | 9.21  | 3.85 | 0.62 |
| 100 | 123.4 | 1.54  | 1.47 | 286.2  | 8.5 | 612.77 | 55.2 | 14.28 | 0.6  | 4.83 | 1.18 | 8.26  | 2.95 | 0.74 |
| 101 | 123.3 | 1.94  | 1.29 | 364.2  | 8.2 | 594.27 | 49.5 | 13.48 | 0.35 | 3.12 | 1.39 | 9.26  | 3.48 | 0.68 |
| 102 | 121.3 | 1.265 | 1.19 | 397.9  | 6.3 | 704.56 | 55.2 | 12.87 | 0.67 | 5.18 | 1.43 | 9.37  | 4.03 | 0.58 |
| 103 | 120.6 | 1.27  | 1.18 | 398.4  | 6.2 | 768.34 | 55.6 | 12.85 | 0.67 | 5.2  | 1.45 | 9.37  | 4.05 | 0.57 |
| 104 | 120.5 | 1.32  | 1.27 | 398.6  | 5.9 | 674.35 | 55.6 | 12.85 | 0.72 | 5.45 | 1.47 | 8.27  | 4.12 | 0.57 |
| 105 | 120   | 1.54  | 1.33 | 248.31 | 8.2 | 647.6  | 53.5 | 13.54 | 0.53 | 4.28 | 1.24 | 9.4   | 4.13 | 0.54 |
| 106 | 119.5 | 1.83  | 1.48 | 284.08 | 9.2 | 612.37 | 56.5 | 14.27 | 0.66 | 5.12 | 1.11 | 8.32  | 3.49 | 0.68 |
| 107 | 119.2 | 1.801 | 1.37 | 247.15 | 6.9 | 614.95 | 45.8 | 15.63 | 0.41 | 3.43 | 1.38 | 9.12  | 3.21 | 0.98 |
| 108 | 116.8 | 1.358 | 1.28 | 368.7  | 5.3 | 797.97 | 56.7 | 13.46 | 0.42 | 3.45 | 1.64 | 8.28  | 3.49 | 0.67 |
| 109 | 116.2 | 1.37  | 1.28 | 376.43 | 5.2 | 699.76 | 54.7 | 13.46 | 0.47 | 3.83 | 1.83 | 8.29  | 3.52 | 0.67 |
| 110 | 115.7 | 1.432 | 1.41 | 310.88 | 6.7 | 683.45 | 54.6 | 12.87 | 0.48 | 3.84 | 1.38 | 8.93  | 3.54 | 0.67 |
| 111 | 115.6 | 1.467 | 1.27 | 376.9  | 5.6 | 759.98 | 58.5 | 14.83 | 0.76 | 5.67 | 1.57 | 8.93  | 3.65 | 0.64 |
| 112 | 115.4 | 1.324 | 1.33 | 385.48 | 5.4 | 698.35 | 54.2 | 14.95 | 0.76 | 5.71 | 1.58 | 8.94  | 3.67 | 0.64 |
| 113 | 115.3 | 1.76  | 1.23 | 395.47 | 5.9 | 685.67 | 53.8 | 13.46 | 0.78 | 5.73 | 1.49 | 10.38 | 3.68 | 0.64 |
| 114 | 115.3 | 1.57  | 0.6  | 410.2  | 6.4 | 635.63 | 50.9 | 13.75 | 0.67 | 5.13 | 1.43 | 9.98  | 3.59 | 0.65 |



|     |       |       |      |        |     |        |      |       |      |      |      |       |      |      |
|-----|-------|-------|------|--------|-----|--------|------|-------|------|------|------|-------|------|------|
| 115 | 114.6 | 1.577 | 1.45 | 214.4  | 5.9 | 695.32 | 52.1 | 13.74 | 0.75 | 5.64 | 1.5  | 10.63 | 4.37 | 0.52 |
| 116 | 113.6 | 1.76  | 1.27 | 386.5  | 6.6 | 638.33 | 46.9 | 13.58 | 0.52 | 4.16 | 1.24 | 8.29  | 3.31 | 0.69 |
| 117 | 113.5 | 1.75  | 1.36 | 342.12 | 6.6 | 714.28 | 52.1 | 13.57 | 0.38 | 3.24 | 1.39 | 8.32  | 4.33 | 0.53 |
| 118 | 113.5 | 1.64  | 1.46 | 290.5  | 6.8 | 615.75 | 48.9 | 12.76 | 0.64 | 4.87 | 1.38 | 8.45  | 3.64 | 0.65 |
| 119 | 113.2 | 1.23  | 1.17 | 296.5  | 5.3 | 788.9  | 52.7 | 13.74 | 0.81 | 5.82 | 1.61 | 7.47  | 4.37 | 0.87 |
| 120 | 113.2 | 1.62  | 1.37 | 340.36 | 6.5 | 643.28 | 52.6 | 13.23 | 0.74 | 5.62 | 1.41 | 9.03  | 4.36 | 0.74 |

**Table C. Biochemical parameters of seronegative RA patients**

|    | <b>ROS<br/>(% of<br/>control)</b> | <b>MDA<br/>(nmol<br/>/ml)</b> | <b>Carbonyl<br/>(nmoles/mg<br/>protein)</b> | <b>T-SH<br/>(<math>\mu</math>M)</b> | <b>Tail<br/>length<br/>(<math>\mu</math>m)</b> | <b>FRAP<br/>(<math>\mu</math>M)</b> | <b>%<br/>quenching<br/>of DPPH</b> | <b>NO<br/>(<math>\mu</math>M)</b> | <b>VITC<br/>(mg/dl)</b> | <b>GSH<br/>(nmoles/mg<br/>Hb)</b> | <b>SOD<br/>(U/mg<br/>Hb)</b> | <b>Catalase<br/>(U/mg<br/>Hb)</b> | <b>GR<br/>(U/g<br/>Hb)</b> | <b>GST<br/>(U/mg<br/>Hb)</b> |
|----|-----------------------------------|-------------------------------|---------------------------------------------|-------------------------------------|------------------------------------------------|-------------------------------------|------------------------------------|-----------------------------------|-------------------------|-----------------------------------|------------------------------|-----------------------------------|----------------------------|------------------------------|
| 1  | 133.6                             | 2.54                          | 1.54                                        | 324.17                              | 7.6                                            | 515.9                               | 45.6                               | 12.85                             | 0.31                    | 2.04                              | 0.7                          | 9.14                              | 2.13                       | 0.5                          |
| 2  | 168.3                             | 2.692                         | 1.59                                        | 247.9                               | 11.6                                           | 506.1                               | 43.5                               | 12.68                             | 0.54                    | 4.38                              | 0.72                         | 9.21                              | 2.09                       | 0.99                         |
| 3  | 164.5                             | 1.993                         | 1.49                                        | 302.6                               | 9.5                                            | 564.32                              | 48.5                               | 12.85                             | 0.3                     | 2.78                              | 0.94                         | 7.29                              | 2.64                       | 0.72                         |
| 4  | 164.3                             | 1.801                         | 1.48                                        | 278.72                              | 9.5                                            | 614.95                              | 50                                 | 14.8                              | 0.26                    | 2.61                              | 0.95                         | 9.87                              | 2.38                       | 0.68                         |
| 5  | 163.2                             | 2                             | 1.59                                        | 280.4                               | 9.4                                            | 557.25                              | 47.28                              | 14.76                             | 0.31                    | 2.84                              | 0.95                         | 8.47                              | 2.43                       | 0.83                         |
| 6  | 151.3                             | 1.935                         | 1.49                                        | 275.14                              | 9.4                                            | 628.56                              | 52.4                               | 14.76                             | 0.5                     | 3.85                              | 0.96                         | 8.48                              | 2.43                       | 0.54                         |
| 7  | 161.2                             | 2.73                          | 1.55                                        | 256.3                               | 9.5                                            | 539.3                               | 46.2                               | 15.84                             | 0.21                    | 2.12                              | 0.94                         | 8.74                              | 2.36                       | 0.84                         |
| 8  | 158.9                             | 2.179                         | 1.38                                        | 292.12                              | 8.3                                            | 543.87                              | 49.6                               | 14.75                             | 0.23                    | 2.34                              | 1.21                         | 7.2                               | 2.35                       | 0.85                         |
| 9  | 158.9                             | 1.391                         | 1.42                                        | 276.2                               | 8.6                                            | 593.22                              | 53.4                               | 14.75                             | 0.14                    | 4.85                              | 1.16                         | 7.63                              | 3.12                       | 0.52                         |
| 10 | 162.9                             | 2.12                          | 1.51                                        | 268.31                              | 11.3                                           | 632.25                              | 50.6                               | 14.74                             | 0.24                    | 2.38                              | 0.74                         | 8.67                              | 3.13                       | 0.74                         |
| 11 | 154.8                             | 2.179                         | 1.41                                        | 265.46                              | 8.1                                            | 650.86                              | 52.6                               | 15.81                             | 0.61                    | 2.79                              | 1.25                         | 7.34                              | 3.17                       | 0.97                         |
| 12 | 154.7                             | 2.198                         | 1.64                                        | 324.28                              | 11.6                                           | 538.24                              | 45.8                               | 15.43                             | 0.28                    | 2.69                              | 0.74                         | 9.28                              | 2.67                       | 0.78                         |
| 13 | 154.6                             | 2.17                          | 1.4                                         | 315.47                              | 9.5                                            | 612.38                              | 49.2                               | 14.95                             | 0.33                    | 2.97                              | 0.94                         | 9.32                              | 2.67                       | 0.77                         |

|    |       |       |      |        |      |        |      |       |      |      |      |       |      |      |
|----|-------|-------|------|--------|------|--------|------|-------|------|------|------|-------|------|------|
| 14 | 154.3 | 2.05  | 1.43 | 297.48 | 8.2  | 648.92 | 49.8 | 14.37 | 0.43 | 3.46 | 1.24 | 9.34  | 2.96 | 0.74 |
| 15 | 153.4 | 1.801 | 1.52 | 312.54 | 10   | 672.62 | 48.2 | 15.64 | 0.24 | 2.43 | 0.87 | 7.31  | 3.24 | 0.72 |
| 16 | 152.3 | 1.57  | 1.42 | 304.53 | 7.6  | 654.32 | 52.7 | 14.24 | 0.26 | 2.58 | 1.29 | 9.53  | 3.49 | 0.83 |
| 17 | 158.7 | 2.583 | 1.59 | 247.32 | 11.2 | 513.72 | 46.9 | 15.08 | 0.25 | 2.46 | 0.81 | 7.06  | 3.34 | 0.69 |
| 18 | 149.2 | 2.038 | 1.49 | 276.8  | 10.3 | 514.81 | 47.6 | 15.05 | 0.4  | 3.38 | 0.85 | 9.72  | 3.42 | 0.69 |
| 19 | 148.7 | 2.37  | 1.49 | 273.7  | 9.6  | 537.68 | 48.9 | 14.85 | 0.37 | 3.18 | 0.94 | 8.29  | 3.43 | 0.68 |
| 20 | 148.5 | 1.28  | 1.52 | 329.64 | 11.8 | 628.48 | 54.2 | 13.62 | 0.36 | 3.13 | 1.3  | 9.22  | 4.13 | 0.82 |
| 21 | 147.5 | 2.038 | 1.37 | 268    | 9.8  | 638.64 | 50.8 | 13.67 | 0.32 | 2.84 | 0.9  | 7.1   | 3.26 | 0.72 |
| 22 | 147.2 | 2.403 | 1.37 | 337.68 | 10.6 | 533.32 | 47.8 | 14.25 | 0.21 | 2.12 | 0.83 | 7.63  | 2.12 | 0.72 |
| 23 | 145.6 | 1.62  | 1.31 | 359.78 | 8.3  | 647.6  | 55.2 | 15.62 | 0.57 | 4.57 | 1.23 | 8.37  | 4.83 | 0.79 |
| 24 | 145.2 | 2.435 | 1.39 | 322.8  | 10.8 | 568.34 | 48.6 | 14.76 | 0.34 | 3.12 | 0.81 | 9.27  | 2.67 | 0.84 |
| 25 | 143.3 | 1.801 | 1.48 | 356.42 | 9.1  | 590.76 | 47.6 | 13.56 | 0.48 | 3.84 | 1.12 | 7.18  | 2.37 | 0.84 |
| 26 | 142.5 | 1.621 | 1.32 | 358.9  | 9.4  | 564.32 | 52.8 | 14.27 | 0.52 | 4.23 | 0.98 | 8.42  | 2.36 | 0.84 |
| 27 | 142.3 | 1.93  | 1.57 | 375.42 | 10.5 | 616.03 | 53.1 | 14.84 | 0.28 | 2.71 | 0.83 | 7.41  | 2.45 | 0.81 |
| 28 | 142.3 | 2.15  | 1.62 | 265.32 | 10.5 | 559.44 | 45.2 | 14.84 | 0.29 | 2.72 | 0.84 | 7.47  | 2.56 | 0.79 |
| 29 | 141.6 | 2.237 | 1.42 | 305.9  | 9.4  | 528.92 | 48.2 | 14.49 | 0.23 | 2.35 | 0.97 | 9.62  | 2.13 | 0.97 |
| 30 | 138.4 | 1.929 | 1.39 | 321.6  | 6.5  | 626.92 | 52.6 | 14.46 | 0.28 | 2.65 | 1.39 | 9.63  | 2.15 | 0.95 |
| 31 | 137.2 | 1.46  | 1.39 | 395.6  | 7.7  | 657.89 | 54.8 | 13.36 | 0.47 | 3.62 | 1.26 | 9.38  | 2.29 | 0.87 |
| 32 | 136.9 | 1.891 | 1.21 | 304.15 | 7.7  | 639.03 | 52.8 | 13.29 | 0.51 | 3.95 | 1.26 | 10.71 | 2.31 | 0.87 |
| 33 | 136.8 | 2.038 | 1.42 | 259.96 | 8.5  | 537.25 | 49   | 13.68 | 0.53 | 4.28 | 1.16 | 8.12  | 2.74 | 0.75 |
| 34 | 136.4 | 2.19  | 1.57 | 254.6  | 8.9  | 543.89 | 49.6 | 13.57 | 0.53 | 4.32 | 1.13 | 10.72 | 2.37 | 0.84 |
| 35 | 136.1 | 2.237 | 1.34 | 354.74 | 8.9  | 657.94 | 50.2 | 13.56 | 0.43 | 3.47 | 1.14 | 10.73 | 2.37 | 0.75 |
| 36 | 135   | 1.243 | 1.43 | 298.7  | 7.6  | 703.73 | 56.2 | 13.28 | 0.58 | 4.73 | 1.28 | 10.28 | 4.73 | 0.74 |
| 37 | 134.7 | 1.76  | 1.27 | 385.8  | 8.2  | 633.45 | 52.8 | 15.27 | 0.36 | 3.16 | 1.24 | 8.12  | 2.85 | 0.75 |
| 38 | 134.5 | 1.78  | 1.38 | 324.56 | 7.5  | 543.2  | 54.1 | 14.74 | 0.37 | 3.16 | 1.3  | 10.75 | 3.29 | 0.69 |
| 39 | 134.5 | 1.87  | 1.35 | 348.67 | 8.5  | 654.13 | 52.4 | 14.69 | 0.34 | 2.98 | 1.19 | 10.81 | 2.96 | 0.74 |
| 40 | 134.2 | 1.737 | 1.52 | 267.15 | 8.8  | 707.89 | 52.1 | 13.52 | 0.51 | 3.92 | 1.15 | 8.19  | 2.64 | 0.79 |
| 41 | 134.2 | 1.467 | 1.34 | 353.95 | 7.3  | 719.29 | 54.9 | 13.49 | 0.57 | 4.64 | 1.35 | 8.25  | 3.12 | 0.52 |
| 42 | 134.2 | 2.03  | 1.35 | 347.85 | 9.6  | 538.98 | 47.5 | 15.37 | 0.54 | 4.32 | 1.35 | 8.11  | 3.57 | 0.66 |

|    |       |       |      |        |     |        |      |       |      |      |      |       |      |      |
|----|-------|-------|------|--------|-----|--------|------|-------|------|------|------|-------|------|------|
| 43 | 134.1 | 1.544 | 1.37 | 332.32 | 7.4 | 687.68 | 54.7 | 12.79 | 0.59 | 4.83 | 1.34 | 9.74  | 4.12 | 0.57 |
| 44 | 172.5 | 1.97  | 1.53 | 340.36 | 8.8 | 682.43 | 53.4 | 14.65 | 0.34 | 3.08 | 1.15 | 8.18  | 3.14 | 0.73 |
| 45 | 133.1 | 1.467 | 1.37 | 334.8  | 8.8 | 648.96 | 50.9 | 14.63 | 0.53 | 4.32 | 1.16 | 10.52 | 3.53 | 0.67 |
| 46 | 132.6 | 1.243 | 1.27 | 376.8  | 7.9 | 728.27 | 52.8 | 13.27 | 0.59 | 4.78 | 1.26 | 10.54 | 4.25 | 0.54 |
| 47 | 132.5 | 1.24  | 1.28 | 376.5  | 7.9 | 602.97 | 53.7 | 13.24 | 0.59 | 4.8  | 1.26 | 8.66  | 4.32 | 0.53 |
| 48 | 132.4 | 1.621 | 1.54 | 257.87 | 7.6 | 534.4  | 49.8 | 14.98 | 0.25 | 2.46 | 1.26 | 8.26  | 2.18 | 0.89 |
| 49 | 129.8 | 1.21  | 1.28 | 376.8  | 7.2 | 687.98 | 54.8 | 14.54 | 0.64 | 4.96 | 1.38 | 8.14  | 2.67 | 0.75 |
| 50 | 128.6 | 1.577 | 1.26 | 387.4  | 7.6 | 581.21 | 53.1 | 15.24 | 0.54 | 4.4  | 1.27 | 8.92  | 3.16 | 0.72 |
| 51 | 128.6 | 1.76  | 1.26 | 387.6  | 7.6 | 585.56 | 52.9 | 15.04 | 0.64 | 4.87 | 1.27 | 8.93  | 3.21 | 0.72 |
| 52 | 126.9 | 1.256 | 1.28 | 376.8  | 7.3 | 734.67 | 56.4 | 13.21 | 0.73 | 5.48 | 1.36 | 8.14  | 3.63 | 0.65 |
| 53 | 126.5 | 1.692 | 1.24 | 392.9  | 8.2 | 587.69 | 51.8 | 14.37 | 0.67 | 5.12 | 1.24 | 10.11 | 2.98 | 0.74 |
| 54 | 126.5 | 1.75  | 1.24 | 393.69 | 8.2 | 632.12 | 52.5 | 14.36 | 0.31 | 2.84 | 1.25 | 10.11 | 2.98 | 0.74 |
| 55 | 126.4 | 1.54  | 1.51 | 269.5  | 8.9 | 615.7  | 52.6 | 12.43 | 0.64 | 4.91 | 1.15 | 8.56  | 3.12 | 0.74 |
| 56 | 126.3 | 1.487 | 1.28 | 367.24 | 9.9 | 684.25 | 52.8 | 12.38 | 0.64 | 4.92 | 0.87 | 8.16  | 2.27 | 0.74 |
| 57 | 124.9 | 1.23  | 1.57 | 254.6  | 7.2 | 649.76 | 52.8 | 14.84 | 0.68 | 5.25 | 1.38 | 8.98  | 3.82 | 0.64 |
| 58 | 124.8 | 1.339 | 1.27 | 380.98 | 7.2 | 684.57 | 55.5 | 14.56 | 0.71 | 5.27 | 1.38 | 9.15  | 3.85 | 0.63 |
| 59 | 124.5 | 1.27  | 1.44 | 354.87 | 9.2 | 593.18 | 54.8 | 14.36 | 0.71 | 5.29 | 1.06 | 9.16  | 3.95 | 0.59 |
| 60 | 124.3 | 1.628 | 1.26 | 387.9  | 5.9 | 721.23 | 56.4 | 14.36 | 0.72 | 5.39 | 1.5  | 9.16  | 3.87 | 0.62 |
| 61 | 123.5 | 1.43  | 1.25 | 388.6  | 5.8 | 756.8  | 53.4 | 12.65 | 0.72 | 5.42 | 1.54 | 9.18  | 3.94 | 0.62 |
| 62 | 123.4 | 1.342 | 1.25 | 389.5  | 5.6 | 673.25 | 55.1 | 12.56 | 0.72 | 5.43 | 1.54 | 9.21  | 3.85 | 0.62 |
| 63 | 123.4 | 1.54  | 1.47 | 286.2  | 8.5 | 612.77 | 55.2 | 14.28 | 0.6  | 4.83 | 1.18 | 8.26  | 2.95 | 0.74 |
| 64 | 123.3 | 1.94  | 1.29 | 364.2  | 8.2 | 594.27 | 49.5 | 13.48 | 0.35 | 3.12 | 1.39 | 9.26  | 3.48 | 0.68 |
| 65 | 121.3 | 1.265 | 1.19 | 397.9  | 6.3 | 704.56 | 55.2 | 12.87 | 0.67 | 5.18 | 1.43 | 9.37  | 4.03 | 0.58 |
| 66 | 120.6 | 1.27  | 1.18 | 398.4  | 6.2 | 768.34 | 55.6 | 12.85 | 0.67 | 5.2  | 1.45 | 9.37  | 4.05 | 0.57 |
| 67 | 120.5 | 1.32  | 1.27 | 398.6  | 5.9 | 674.35 | 55.6 | 12.85 | 0.72 | 5.45 | 1.47 | 8.27  | 4.12 | 0.57 |
| 68 | 120   | 1.54  | 1.33 | 248.31 | 8.2 | 647.6  | 53.5 | 13.54 | 0.53 | 4.28 | 1.24 | 9.4   | 4.13 | 0.54 |
| 69 | 119.2 | 1.801 | 1.37 | 247.15 | 6.9 | 614.95 | 45.8 | 15.63 | 0.41 | 3.43 | 1.38 | 9.12  | 3.21 | 0.98 |
| 70 | 116.2 | 1.37  | 1.28 | 376.43 | 5.2 | 699.76 | 54.7 | 13.46 | 0.47 | 3.83 | 1.83 | 8.29  | 3.52 | 0.67 |
| 71 | 115.7 | 1.432 | 1.41 | 310.88 | 6.7 | 683.45 | 54.6 | 12.87 | 0.48 | 3.84 | 1.38 | 8.93  | 3.54 | 0.67 |

|    |       |       |      |        |     |        |      |       |      |      |      |       |      |      |
|----|-------|-------|------|--------|-----|--------|------|-------|------|------|------|-------|------|------|
| 72 | 115.6 | 1.467 | 1.27 | 376.9  | 5.6 | 759.98 | 58.5 | 14.83 | 0.76 | 5.67 | 1.57 | 8.93  | 3.65 | 0.64 |
| 73 | 115.4 | 1.324 | 1.33 | 385.48 | 5.4 | 698.35 | 54.2 | 14.95 | 0.76 | 5.71 | 1.58 | 8.94  | 3.67 | 0.64 |
| 74 | 115.3 | 1.57  | 0.6  | 410.2  | 6.4 | 635.63 | 50.9 | 13.75 | 0.67 | 5.13 | 1.43 | 9.98  | 3.59 | 0.65 |
| 75 | 114.6 | 1.577 | 1.45 | 214.4  | 5.9 | 695.32 | 52.1 | 13.74 | 0.75 | 5.64 | 1.5  | 10.63 | 4.37 | 0.52 |
| 76 | 113.5 | 1.75  | 1.36 | 342.12 | 6.6 | 714.28 | 52.1 | 13.57 | 0.38 | 3.24 | 1.39 | 8.32  | 4.33 | 0.53 |
| 77 | 113.2 | 1.23  | 1.17 | 296.5  | 5.3 | 788.9  | 52.7 | 13.74 | 0.81 | 5.82 | 1.61 | 7.47  | 4.37 | 0.87 |

**Table D. Biochemical parameters of seropositive RA patients**

|    | ROS (% of control) | MDA (nmol/ml) | Carbonyl (nmoles/mg protein) | T-SH ( $\mu$ M) | Tail length ( $\mu$ m) | FRAP ( $\mu$ M) | % quenching of DPPH | NO ( $\mu$ M) | VITC (mg/dl) | GSH (nmoles/mg Hb) | SOD (U/mg Hb) | Catalase (U/mg Hb) | GR (U/g Hb) | GST (U/mg Hb) |
|----|--------------------|---------------|------------------------------|-----------------|------------------------|-----------------|---------------------|---------------|--------------|--------------------|---------------|--------------------|-------------|---------------|
| 1  | 168.4              | 2.76          | 1.59                         | 248.6           | 11.6                   | 502.84          | 45.8                | 15.57         | 0.53         | 4.28               | 0.72          | 7.34               | 2.35        | 0.85          |
| 2  | 164.8              | 2.621         | 1.53                         | 262.64          | 11.3                   | 526.79          | 45.8                | 15.04         | 0.57         | 4.56               | 0.78          | 7.94               | 2.15        | 0.95          |
| 3  | 162.3              | 2.224         | 1.48                         | 278.75          | 10.3                   | 594.58          | 51                  | 14.83         | 0.33         | 2.97               | 0.84          | 7.83               | 2.43        | 0.81          |
| 4  | 159.6              | 2.32          | 1.47                         | 286.75          | 8.4                    | 568.14          | 46.7                | 14.83         | 0.29         | 2.73               | 1.2           | 7.24               | 0.54        | 0.76          |
| 5  | 158.9              | 2.692         | 1.5                          | 270.68          | 12.6                   | 504.54          | 48.6                | 15.86         | 0.24         | 2.37               | 0.67          | 9.64               | 2.29        | 0.87          |
| 6  | 154.9              | 2.57          | 1.41                         | 312.5           | 8.5                    | 553.99          | 48.2                | 14.85         | 0.21         | 2.17               | 1.18          | 9.28               | 2.6         | 0.79          |
| 7  | 153.1              | 1.987         | 1.58                         | 254.15          | 9.6                    | 510.46          | 46.2                | 15.28         | 0.47         | 3.68               | 0.93          | 8.29               | 3.06        | 0.74          |
| 8  | 152.3              | 2.57          | 1.48                         | 278.49          | 9.5                    | 535.08          | 50.5                | 14.87         | 0.34         | 3.04               | 0.94          | 10.92              | 3.28        | 0.69          |
| 9  | 148.7              | 2.57          | 1.5                          | 269.8           | 9.6                    | 588.82          | 49.2                | 14.85         | 0.39         | 3.28               | 0.94          | 8.28               | 3.43        | 0.69          |
| 10 | 148.6              | 1.935         | 1.46                         | 286.76          | 8.5                    | 518.08          | 47.3                | 14.37         | 0.41         | 3.43               | 1.18          | 8.29               | 3.46        | 0.68          |
| 11 | 147.8              | 1.98          | 1.46                         | 287.14          | 7.5                    | 612.87          | 49.8                | 14.38         | 0.39         | 3.38               | 1.32          | 7.17               | 3.47        | 0.68          |
| 12 | 147.5              | 2.179         | 1.64                         | 234.1           | 8.9                    | 581.21          | 48.4                | 14.38         | 0.29         | 2.74               | 1.14          | 7.37               | 4.03        | 0.58          |
| 13 | 146.9              | 2.435         | 1.47                         | 284.63          | 10.6                   | 561.61          | 46.8                | 14.21         | 0.21         | 2.15               | 0.83          | 7.63               | 2.12        | 0.97          |
| 14 | 146.9              | 2.18          | 1.36                         | 343.34          | 10.5                   | 631.02          | 50.2                | 13.75         | 0.34         | 3.08               | 0.83          | 7.38               | 3.65        | 0.64          |
| 15 | 146.8              | 1.325         | 1.37                         | 327.9           | 9.2                    | 582.39          | 52.9                | 13.63         | 0.34         | 3.12               | 1.105         | 7.39               | 2.76        | 0.75          |
| 16 | 143.8              | 2.391         | 1.63                         | 246.24          | 9.3                    | 551.82          | 47.2                | 13.84         | 0.45         | 3.54               | 1.03          | 10.82              | 2.66        | 0.78          |

|    |       |       |      |        |      |        |      |       |      |      |       |       |      |      |
|----|-------|-------|------|--------|------|--------|------|-------|------|------|-------|-------|------|------|
| 17 | 143.5 | 2.403 | 1.38 | 324.4  | 9.6  | 568.37 | 46.9 | 13.84 | 0.46 | 3.57 | 0.91  | 7.05  | 2.67 | 0.78 |
| 18 | 143.5 | 2.378 | 1.28 | 367.8  | 9.6  | 535.49 | 48.7 | 13.82 | 0.47 | 3.62 | 0.93  | 11.28 | 2.67 | 0.78 |
| 19 | 142.8 | 2.378 | 1.37 | 334.2  | 10.7 | 563.58 | 48.6 | 13.28 | 0.38 | 3.27 | 0.82  | 7.53  | 4.16 | 0.54 |
| 20 | 142.6 | 2.06  | 1.28 | 365.64 | 10.6 | 607.98 | 49.5 | 13.28 | 0.32 | 2.94 | 0.82  | 7.54  | 2.67 | 1.06 |
| 21 | 142.5 | 2.05  | 1.37 | 332.32 | 8.3  | 568.14 | 48.5 | 15.7  | 0.26 | 2.64 | 1.22  | 7.64  | 3.76 | 0.64 |
| 22 | 142.5 | 2.13  | 1.38 | 324.53 | 8.3  | 574.37 | 49.8 | 14.3  | 0.27 | 2.64 | 1.224 | 7.68  | 3.78 | 0.64 |
| 23 | 142.3 | 2.134 | 1.54 | 262.64 | 9.2  | 555.08 | 50.5 | 15.03 | 0.41 | 3.42 | 1.08  | 7.93  | 2.19 | 0.53 |
| 24 | 137.5 | 1.5   | 1.45 | 292.12 | 8.6  | 635.63 | 53.5 | 13.74 | 0.54 | 4.52 | 1.16  | 7.94  | 2.15 | 0.94 |
| 25 | 136.5 | 1.891 | 1.36 | 343.04 | 9.2  | 573.65 | 49.6 | 13.73 | 0.43 | 3.48 | 1.1   | 7.98  | 2.19 | 0.87 |
| 26 | 134.8 | 2.012 | 1.58 | 375.46 | 10.2 | 696.58 | 52.7 | 14.58 | 0.52 | 4.28 | 0.85  | 10.14 | 2.75 | 0.75 |
| 27 | 132.4 | 1.935 | 1.32 | 357.64 | 7.6  | 698.76 | 52.9 | 15.02 | 0.25 | 2.46 | 1.26  | 8.26  | 2.16 | 0.92 |
| 28 | 132   | 1.95  | 1.28 | 249.24 | 9.3  | 521.92 | 45.6 | 14.85 | 0.55 | 4.55 | 1.02  | 8.37  | 3.46 | 0.68 |
| 29 | 131.2 | 1.942 | 1.28 | 368.74 | 9.3  | 685.95 | 52.4 | 14.85 | 0.58 | 4.73 | 1.02  | 8.37  | 3.46 | 0.68 |
| 30 | 129.8 | 1.935 | 1.32 | 358.6  | 8.4  | 785.45 | 50.3 | 15.31 | 0.3  | 2.76 | 1.2   | 8.38  | 3.47 | 0.68 |
| 31 | 129.8 | 1.692 | 1.37 | 328.3  | 7.6  | 625.69 | 50.8 | 15.27 | 0.54 | 4.37 | 1.27  | 8.76  | 3.15 | 0.73 |
| 32 | 128.3 | 1.628 | 1.37 | 332.32 | 7.4  | 594.38 | 53.4 | 14.35 | 0.57 | 4.58 | 1.34  | 10.15 | 3.27 | 0.7  |
| 33 | 127.8 | 1.84  | 1.28 | 254.7  | 7.3  | 584.47 | 44.2 | 14.33 | 0.67 | 5.14 | 0.93  | 10.26 | 3.28 | 0.7  |
| 34 | 125.9 | 1.57  | 1.41 | 315.2  | 7.6  | 637.25 | 50.7 | 14.25 | 0.38 | 3.27 | 1.28  | 9.42  | 3.25 | 0.72 |
| 35 | 125.6 | 1.61  | 1.39 | 321    | 7.6  | 647.6  | 54.2 | 14.25 | 0.61 | 4.86 | 1.29  | 9.42  | 3.26 | 0.72 |
| 36 | 125.6 | 1.737 | 1.39 | 324.28 | 7.5  | 713.43 | 51.6 | 12.48 | 0.65 | 5.12 | 1.3   | 9.45  | 2.95 | 0.74 |
| 37 | 124.9 | 1.85  | 1.14 | 398.8  | 7.5  | 589.45 | 50.1 | 14.62 | 0.45 | 3.51 | 1.31  | 9.48  | 2.94 | 0.88 |
| 38 | 119.5 | 1.83  | 1.48 | 284.08 | 9.2  | 612.37 | 56.5 | 14.27 | 0.66 | 5.12 | 1.11  | 8.32  | 3.49 | 0.68 |
| 39 | 116.8 | 1.358 | 1.28 | 368.7  | 5.3  | 797.97 | 56.7 | 13.46 | 0.42 | 3.45 | 1.64  | 8.28  | 3.49 | 0.67 |
| 40 | 115.3 | 1.76  | 1.23 | 395.47 | 5.9  | 685.67 | 53.8 | 13.46 | 0.78 | 5.73 | 1.49  | 10.38 | 3.68 | 0.64 |
| 41 | 113.6 | 1.76  | 1.27 | 386.5  | 6.6  | 638.33 | 46.9 | 13.58 | 0.52 | 4.16 | 1.24  | 8.29  | 3.31 | 0.69 |
| 42 | 113.5 | 1.64  | 1.46 | 290.5  | 6.8  | 615.75 | 48.9 | 12.76 | 0.64 | 4.87 | 1.38  | 8.45  | 3.64 | 0.65 |
| 43 | 113.2 | 1.62  | 1.37 | 340.36 | 6.5  | 643.28 | 52.6 | 13.23 | 0.74 | 5.62 | 1.41  | 9.03  | 4.36 | 0.74 |

**Table E. Biochemical parameters of RA patients with DAS<2.4**

|    | <b>ROS<br/>(% of<br/>control)</b> | <b>MDA<br/>(nmol<br/>/ml)</b> | <b>Carbonyl<br/>(nmoles/mg<br/>protein)</b> | <b>T-SH<br/>(<math>\mu</math>M)</b> | <b>Tail<br/>length<br/>(<math>\mu</math>m)</b> | <b>FRAP<br/>(<math>\mu</math>M)</b> | <b>%<br/>quenching<br/>of DPPH</b> | <b>NO<br/>(<math>\mu</math>M)</b> | <b>VITC<br/>(mg/dl)</b> | <b>GSH<br/>(nmoles/mg<br/>Hb)</b> | <b>SOD<br/>(U/mg<br/>Hb)</b> | <b>Catalase<br/>(U/mg<br/>Hb)</b> | <b>GR<br/>(U/g<br/>Hb)</b> | <b>GST<br/>(U/mg<br/>Hb)</b> |
|----|-----------------------------------|-------------------------------|---------------------------------------------|-------------------------------------|------------------------------------------------|-------------------------------------|------------------------------------|-----------------------------------|-------------------------|-----------------------------------|------------------------------|-----------------------------------|----------------------------|------------------------------|
| 1  | 133.6                             | 2.54                          | 1.54                                        | 324.17                              | 7.6                                            | 515.9                               | 45.6                               | 12.85                             | 0.31                    | 2.04                              | 0.7                          | 9.14                              | 2.13                       | 0.5                          |
| 2  | 164.5                             | 1.993                         | 1.49                                        | 302.6                               | 9.5                                            | 564.32                              | 48.5                               | 12.85                             | 0.3                     | 2.78                              | 0.94                         | 7.29                              | 2.64                       | 0.72                         |
| 3  | 164.3                             | 1.801                         | 1.48                                        | 278.72                              | 9.5                                            | 614.95                              | 50                                 | 14.8                              | 0.26                    | 2.61                              | 0.95                         | 9.87                              | 2.38                       | 0.68                         |
| 4  | 163.2                             | 2                             | 1.59                                        | 280.4                               | 9.4                                            | 557.25                              | 47.28                              | 14.76                             | 0.31                    | 2.84                              | 0.95                         | 8.47                              | 2.43                       | 0.83                         |
| 5  | 151.3                             | 1.935                         | 1.49                                        | 275.14                              | 9.4                                            | 628.56                              | 52.4                               | 14.76                             | 0.5                     | 3.85                              | 0.96                         | 8.48                              | 2.43                       | 0.54                         |
| 6  | 162.3                             | 2.224                         | 1.48                                        | 278.75                              | 10.3                                           | 594.58                              | 51                                 | 14.83                             | 0.33                    | 2.97                              | 0.84                         | 7.83                              | 2.43                       | 0.81                         |
| 7  | 158.9                             | 1.391                         | 1.42                                        | 276.2                               | 8.6                                            | 593.22                              | 53.4                               | 14.75                             | 0.14                    | 4.85                              | 1.16                         | 7.63                              | 3.12                       | 0.52                         |
| 8  | 154.8                             | 2.179                         | 1.41                                        | 265.46                              | 8.1                                            | 650.86                              | 52.6                               | 15.81                             | 0.61                    | 2.79                              | 1.25                         | 7.34                              | 3.17                       | 0.97                         |
| 9  | 153.4                             | 1.801                         | 1.52                                        | 312.54                              | 10                                             | 672.62                              | 48.2                               | 15.64                             | 0.24                    | 2.43                              | 0.87                         | 7.31                              | 3.24                       | 0.72                         |
| 10 | 152.3                             | 1.57                          | 1.42                                        | 304.53                              | 7.6                                            | 654.32                              | 52.7                               | 14.24                             | 0.26                    | 2.58                              | 1.29                         | 9.53                              | 3.49                       | 0.83                         |
| 11 | 148.5                             | 1.28                          | 1.37                                        | 329.64                              | 11.8                                           | 628.48                              | 54.2                               | 13.62                             | 0.36                    | 3.13                              | 1.3                          | 9.22                              | 4.13                       | 0.82                         |
| 12 | 147.8                             | 1.98                          | 1.46                                        | 287.14                              | 7.5                                            | 612.87                              | 49.8                               | 14.38                             | 0.39                    | 3.38                              | 1.32                         | 7.17                              | 3.47                       | 0.68                         |
| 13 | 146.9                             | 2.18                          | 1.36                                        | 343.34                              | 10.5                                           | 631.02                              | 50.2                               | 13.75                             | 0.34                    | 3.08                              | 0.83                         | 7.38                              | 3.65                       | 0.64                         |
| 14 | 146.8                             | 1.325                         | 1.37                                        | 327.9                               | 9.2                                            | 582.39                              | 52.9                               | 13.63                             | 0.34                    | 3.12                              | 1.105                        | 7.39                              | 2.76                       | 0.75                         |
| 15 | 145.6                             | 1.62                          | 1.31                                        | 359.78                              | 8.3                                            | 647.6                               | 55.2                               | 15.62                             | 0.57                    | 4.57                              | 1.23                         | 8.37                              | 4.83                       | 0.79                         |
| 16 | 143.3                             | 1.801                         | 1.48                                        | 356.42                              | 9.1                                            | 590.76                              | 47.6                               | 13.56                             | 0.48                    | 3.84                              | 1.12                         | 7.18                              | 2.37                       | 0.84                         |
| 17 | 142.5                             | 1.621                         | 1.32                                        | 358.9                               | 9.4                                            | 564.32                              | 52.8                               | 14.27                             | 0.52                    | 4.23                              | 0.98                         | 8.42                              | 2.36                       | 0.84                         |
| 18 | 137.5                             | 1.5                           | 1.45                                        | 292.12                              | 8.6                                            | 635.63                              | 53.5                               | 13.74                             | 0.54                    | 4.52                              | 1.16                         | 7.94                              | 2.15                       | 0.94                         |
| 19 | 137.2                             | 1.46                          | 1.39                                        | 395.6                               | 7.7                                            | 657.89                              | 54.8                               | 13.36                             | 0.47                    | 3.62                              | 1.26                         | 9.38                              | 2.29                       | 0.87                         |
| 20 | 135                               | 1.243                         | 1.43                                        | 298.7                               | 7.6                                            | 703.73                              | 56.2                               | 13.28                             | 0.58                    | 4.73                              | 1.28                         | 10.28                             | 4.73                       | 0.74                         |
| 21 | 134.2                             | 1.737                         | 1.52                                        | 267.15                              | 8.8                                            | 707.89                              | 52.1                               | 13.52                             | 0.51                    | 3.92                              | 1.15                         | 8.19                              | 2.64                       | 0.79                         |
| 22 | 134.2                             | 1.467                         | 1.34                                        | 353.95                              | 7.3                                            | 719.29                              | 54.9                               | 13.49                             | 0.57                    | 4.64                              | 1.35                         | 8.25                              | 3.12                       | 0.52                         |
| 23 | 134.1                             | 1.544                         | 1.37                                        | 332.32                              | 7.4                                            | 687.68                              | 54.7                               | 12.79                             | 0.59                    | 4.83                              | 1.34                         | 9.74                              | 4.12                       | 0.57                         |

|    |       |       |      |        |     |        |      |       |      |      |      |       |      |      |
|----|-------|-------|------|--------|-----|--------|------|-------|------|------|------|-------|------|------|
| 24 | 133.1 | 1.467 | 1.37 | 334.8  | 8.8 | 648.96 | 50.9 | 14.63 | 0.53 | 4.32 | 1.16 | 10.52 | 3.53 | 0.67 |
| 25 | 132.6 | 1.243 | 1.27 | 376.8  | 7.9 | 728.27 | 52.8 | 13.27 | 0.59 | 4.78 | 1.26 | 10.54 | 4.25 | 0.54 |
| 26 | 132.5 | 1.24  | 1.28 | 376.5  | 7.9 | 602.97 | 53.7 | 13.24 | 0.59 | 4.8  | 1.26 | 8.66  | 4.32 | 0.53 |
| 27 | 129.8 | 1.21  | 1.28 | 376.8  | 7.2 | 687.98 | 54.8 | 14.54 | 0.64 | 4.96 | 1.38 | 8.14  | 2.67 | 0.75 |
| 28 | 126.9 | 1.256 | 1.28 | 376.8  | 7.3 | 734.67 | 56.4 | 13.21 | 0.73 | 5.48 | 1.36 | 8.14  | 3.63 | 0.65 |
| 29 | 126.4 | 1.54  | 1.51 | 269.5  | 8.9 | 615.7  | 52.6 | 12.43 | 0.64 | 4.91 | 1.15 | 8.56  | 3.12 | 0.74 |
| 30 | 126.3 | 1.487 | 1.28 | 367.24 | 9.9 | 684.25 | 52.8 | 12.38 | 0.64 | 4.92 | 0.87 | 8.16  | 2.27 | 0.74 |
| 31 | 124.9 | 1.23  | 1.57 | 254.6  | 7.2 | 649.76 | 52.8 | 14.84 | 0.68 | 5.25 | 1.38 | 8.98  | 3.82 | 0.64 |
| 32 | 124.8 | 1.339 | 1.27 | 380.98 | 7.2 | 684.57 | 55.5 | 14.56 | 0.71 | 5.27 | 1.38 | 9.15  | 3.85 | 0.63 |
| 33 | 124.5 | 1.27  | 1.44 | 354.87 | 9.2 | 593.18 | 54.8 | 14.36 | 0.71 | 5.29 | 1.06 | 9.16  | 3.95 | 0.59 |
| 34 | 124.3 | 1.628 | 1.26 | 387.9  | 5.9 | 721.23 | 56.4 | 14.36 | 0.72 | 5.39 | 1.5  | 9.16  | 3.87 | 0.62 |
| 35 | 123.5 | 1.43  | 1.25 | 388.6  | 5.8 | 756.8  | 53.4 | 12.65 | 0.72 | 5.42 | 1.54 | 9.18  | 3.94 | 0.62 |
| 36 | 123.4 | 1.342 | 1.25 | 389.5  | 5.6 | 673.25 | 55.1 | 12.56 | 0.72 | 5.43 | 1.54 | 9.21  | 3.85 | 0.62 |
| 37 | 123.4 | 1.54  | 1.47 | 286.2  | 8.5 | 612.77 | 55.2 | 14.28 | 0.6  | 4.83 | 1.18 | 8.26  | 2.95 | 0.74 |
| 38 | 121.3 | 1.265 | 1.19 | 397.9  | 6.3 | 704.56 | 55.2 | 12.87 | 0.67 | 5.18 | 1.43 | 9.37  | 4.03 | 0.58 |
| 39 | 120.6 | 1.27  | 1.18 | 398.4  | 6.2 | 768.34 | 55.6 | 12.85 | 0.67 | 5.2  | 1.45 | 9.37  | 4.05 | 0.57 |
| 40 | 120.5 | 1.32  | 1.27 | 398.6  | 5.9 | 674.35 | 55.6 | 12.85 | 0.72 | 5.45 | 1.47 | 8.27  | 4.12 | 0.57 |
| 41 | 120   | 1.54  | 1.33 | 248.31 | 8.2 | 647.6  | 53.5 | 13.54 | 0.53 | 4.28 | 1.24 | 9.4   | 4.13 | 0.54 |
| 42 | 119.5 | 1.83  | 1.48 | 284.08 | 9.2 | 612.37 | 56.5 | 14.27 | 0.66 | 5.12 | 1.11 | 8.32  | 3.49 | 0.68 |
| 43 | 116.8 | 1.358 | 1.28 | 368.7  | 5.3 | 797.97 | 56.7 | 13.46 | 0.42 | 3.45 | 1.64 | 8.28  | 3.49 | 0.67 |
| 44 | 116.2 | 1.37  | 1.28 | 376.43 | 5.2 | 699.76 | 54.7 | 13.46 | 0.47 | 3.83 | 1.83 | 8.29  | 3.52 | 0.67 |
| 45 | 115.6 | 1.467 | 1.27 | 376.9  | 5.6 | 759.98 | 58.5 | 14.83 | 0.76 | 5.67 | 1.57 | 8.93  | 3.65 | 0.64 |
| 46 | 115.4 | 1.324 | 1.33 | 385.48 | 5.4 | 698.35 | 54.2 | 14.95 | 0.76 | 5.71 | 1.58 | 8.94  | 3.67 | 0.64 |
| 47 | 115.3 | 1.76  | 1.23 | 395.47 | 5.9 | 685.67 | 53.8 | 13.46 | 0.78 | 5.73 | 1.49 | 10.38 | 3.68 | 0.64 |
| 48 | 115.3 | 1.57  | 0.6  | 410.2  | 6.4 | 635.63 | 50.9 | 13.75 | 0.67 | 5.13 | 1.43 | 9.98  | 3.59 | 0.65 |
| 49 | 113.2 | 1.23  | 1.17 | 296.5  | 5.3 | 788.9  | 52.7 | 13.74 | 0.81 | 5.82 | 1.61 | 7.47  | 4.37 | 0.87 |

**Table F. Biochemical parameters of RA patients with DAS>2.4**

|    | <b>ROS<br/>(% of<br/>control)</b> | <b>MDA<br/>(nmol<br/>/ml)</b> | <b>Carbonyl<br/>(nmoles/mg<br/>protein)</b> | <b>T-SH<br/>(<math>\mu</math>M)</b> | <b>Tail<br/>length<br/>(<math>\mu</math>m)</b> | <b>FRAP<br/>(<math>\mu</math>M)</b> | <b>%<br/>quenching<br/>of DPPH</b> | <b>NO<br/>(<math>\mu</math>M)</b> | <b>VITC<br/>(mg/dl)</b> | <b>GSH<br/>(nmoles/mg<br/>Hb)</b> | <b>SOD<br/>(U/mg<br/>Hb)</b> | <b>Catalase<br/>(U/mg<br/>Hb)</b> | <b>GR<br/>(U/g<br/>Hb)</b> | <b>GST<br/>(U/mg<br/>Hb)</b> |
|----|-----------------------------------|-------------------------------|---------------------------------------------|-------------------------------------|------------------------------------------------|-------------------------------------|------------------------------------|-----------------------------------|-------------------------|-----------------------------------|------------------------------|-----------------------------------|----------------------------|------------------------------|
| 1  | 168.4                             | 2.76                          | 1.59                                        | 248.6                               | 11.6                                           | 502.84                              | 45.8                               | 15.57                             | 0.53                    | 4.28                              | 0.72                         | 7.34                              | 2.35                       | 0.85                         |
| 2  | 168.3                             | 2.692                         | 1.59                                        | 247.9                               | 11.6                                           | 506.1                               | 43.5                               | 12.68                             | 0.54                    | 4.38                              | 0.72                         | 9.21                              | 2.09                       | 0.99                         |
| 3  | 164.8                             | 2.621                         | 1.53                                        | 262.64                              | 11.3                                           | 526.79                              | 45.8                               | 15.04                             | 0.57                    | 4.56                              | 0.78                         | 7.94                              | 2.15                       | 0.95                         |
| 4  | 161.2                             | 2.73                          | 1.55                                        | 256.3                               | 9.5                                            | 539.3                               | 46.2                               | 15.84                             | 0.21                    | 2.12                              | 0.94                         | 8.74                              | 2.36                       | 0.84                         |
| 5  | 159.6                             | 2.32                          | 1.47                                        | 286.75                              | 8.4                                            | 568.14                              | 46.7                               | 14.83                             | 0.29                    | 2.73                              | 1.2                          | 7.24                              | 0.54                       | 0.76                         |
| 6  | 158.9                             | 2.179                         | 1.38                                        | 292.12                              | 8.3                                            | 543.87                              | 49.6                               | 14.75                             | 0.23                    | 2.34                              | 1.21                         | 7.2                               | 2.35                       | 0.85                         |
| 7  | 158.9                             | 2.692                         | 1.5                                         | 270.68                              | 12.6                                           | 504.54                              | 48.6                               | 15.86                             | 0.24                    | 2.37                              | 0.67                         | 9.64                              | 2.29                       | 0.87                         |
| 8  | 162.9                             | 2.12                          | 1.51                                        | 268.31                              | 11.3                                           | 632.25                              | 50.6                               | 14.74                             | 0.24                    | 2.38                              | 0.74                         | 8.67                              | 3.13                       | 0.74                         |
| 9  | 154.9                             | 2.57                          | 1.41                                        | 312.5                               | 8.5                                            | 553.99                              | 48.2                               | 14.85                             | 0.21                    | 2.17                              | 1.18                         | 9.28                              | 2.6                        | 0.79                         |
| 10 | 154.7                             | 2.198                         | 1.64                                        | 324.28                              | 11.6                                           | 538.24                              | 45.8                               | 15.43                             | 0.28                    | 2.69                              | 0.74                         | 9.28                              | 2.67                       | 0.78                         |
| 11 | 154.6                             | 2.17                          | 1.4                                         | 315.47                              | 9.5                                            | 612.38                              | 49.2                               | 14.95                             | 0.33                    | 2.97                              | 0.94                         | 9.32                              | 2.67                       | 0.77                         |
| 12 | 154.3                             | 2.05                          | 1.43                                        | 297.48                              | 8.2                                            | 648.92                              | 49.8                               | 14.37                             | 0.43                    | 3.46                              | 1.24                         | 9.34                              | 2.96                       | 0.74                         |
| 13 | 153.1                             | 1.987                         | 1.58                                        | 254.15                              | 9.6                                            | 510.46                              | 46.2                               | 15.28                             | 0.47                    | 3.68                              | 0.93                         | 8.29                              | 3.06                       | 0.74                         |
| 14 | 152.3                             | 2.57                          | 1.48                                        | 278.49                              | 9.5                                            | 535.08                              | 50.5                               | 14.87                             | 0.34                    | 3.04                              | 0.94                         | 10.92                             | 3.28                       | 0.69                         |
| 15 | 158.7                             | 2.583                         | 1.59                                        | 247.32                              | 11.2                                           | 513.72                              | 46.9                               | 15.08                             | 0.25                    | 2.46                              | 0.81                         | 7.06                              | 3.34                       | 0.69                         |
| 16 | 149.2                             | 2.038                         | 1.49                                        | 276.8                               | 10.3                                           | 514.81                              | 47.6                               | 15.05                             | 0.4                     | 3.38                              | 0.85                         | 9.72                              | 3.42                       | 0.69                         |
| 17 | 148.7                             | 2.57                          | 1.5                                         | 269.8                               | 9.6                                            | 588.82                              | 49.2                               | 14.85                             | 0.39                    | 3.28                              | 0.94                         | 8.28                              | 3.43                       | 0.69                         |
| 18 | 148.7                             | 2.37                          | 1.49                                        | 273.7                               | 9.6                                            | 537.68                              | 48.9                               | 14.85                             | 0.37                    | 3.18                              | 0.94                         | 8.29                              | 3.43                       | 0.68                         |
| 19 | 148.6                             | 1.935                         | 1.46                                        | 286.76                              | 8.5                                            | 518.08                              | 47.3                               | 14.37                             | 0.41                    | 3.43                              | 1.18                         | 8.29                              | 3.46                       | 0.68                         |
| 20 | 147.5                             | 2.038                         | 1.37                                        | 268                                 | 9.8                                            | 638.64                              | 50.8                               | 13.67                             | 0.32                    | 2.84                              | 0.9                          | 7.1                               | 3.26                       | 0.72                         |
| 21 | 147.5                             | 2.179                         | 1.64                                        | 234.1                               | 8.9                                            | 581.21                              | 48.4                               | 14.38                             | 0.29                    | 2.74                              | 1.14                         | 7.37                              | 4.03                       | 0.58                         |
| 22 | 147.2                             | 2.403                         | 1.52                                        | 337.68                              | 10.6                                           | 533.32                              | 47.8                               | 14.25                             | 0.21                    | 2.12                              | 0.83                         | 7.63                              | 2.12                       | 0.72                         |
| 23 | 146.9                             | 2.435                         | 1.47                                        | 284.63                              | 10.6                                           | 561.61                              | 46.8                               | 14.21                             | 0.21                    | 2.15                              | 0.83                         | 7.63                              | 2.12                       | 0.97                         |
| 24 | 145.2                             | 2.435                         | 1.39                                        | 322.8                               | 10.8                                           | 568.34                              | 48.6                               | 14.76                             | 0.34                    | 3.12                              | 0.81                         | 9.27                              | 2.67                       | 0.84                         |
| 25 | 143.8                             | 2.391                         | 1.63                                        | 246.24                              | 9.3                                            | 551.82                              | 47.2                               | 13.84                             | 0.45                    | 3.54                              | 1.03                         | 10.82                             | 2.66                       | 0.78                         |



|    |       |       |      |        |      |        |      |       |      |      |       |       |      |      |
|----|-------|-------|------|--------|------|--------|------|-------|------|------|-------|-------|------|------|
| 26 | 143.5 | 2.403 | 1.38 | 324.4  | 9.6  | 568.37 | 46.9 | 13.84 | 0.46 | 3.57 | 0.91  | 7.05  | 2.67 | 0.78 |
| 27 | 143.5 | 2.378 | 1.28 | 367.8  | 9.6  | 535.49 | 48.7 | 13.82 | 0.47 | 3.62 | 0.93  | 11.28 | 2.67 | 0.78 |
| 28 | 142.8 | 2.378 | 1.37 | 334.2  | 10.7 | 563.58 | 48.6 | 13.28 | 0.38 | 3.27 | 0.82  | 7.53  | 4.16 | 0.54 |
| 29 | 142.6 | 2.06  | 1.28 | 365.64 | 10.6 | 607.98 | 49.5 | 13.28 | 0.32 | 2.94 | 0.82  | 7.54  | 2.67 | 1.06 |
| 30 | 142.5 | 2.05  | 1.37 | 332.32 | 8.3  | 568.14 | 48.5 | 15.7  | 0.26 | 2.64 | 1.22  | 7.64  | 3.76 | 0.64 |
| 31 | 142.5 | 2.13  | 1.38 | 324.53 | 8.3  | 574.37 | 49.8 | 14.3  | 0.27 | 2.64 | 1.224 | 7.68  | 3.78 | 0.64 |
| 32 | 142.3 | 1.93  | 1.57 | 375.42 | 10.5 | 616.03 | 53.1 | 14.84 | 0.28 | 2.71 | 0.83  | 7.41  | 2.45 | 0.81 |
| 33 | 142.3 | 2.15  | 1.62 | 265.32 | 10.5 | 559.44 | 45.2 | 14.84 | 0.29 | 2.72 | 0.84  | 7.47  | 2.56 | 0.79 |
| 34 | 142.3 | 2.134 | 1.54 | 262.64 | 9.2  | 555.08 | 50.5 | 15.03 | 0.41 | 3.42 | 1.08  | 7.93  | 2.19 | 0.53 |
| 35 | 141.6 | 2.237 | 1.42 | 305.9  | 9.4  | 528.92 | 48.2 | 14.49 | 0.23 | 2.35 | 0.97  | 9.62  | 2.13 | 0.97 |
| 36 | 138.4 | 1.929 | 1.39 | 321.6  | 6.5  | 626.92 | 52.6 | 14.46 | 0.28 | 2.65 | 1.39  | 9.63  | 2.15 | 0.95 |
| 37 | 136.9 | 1.891 | 1.21 | 304.15 | 7.7  | 639.03 | 52.8 | 13.29 | 0.51 | 3.95 | 1.26  | 10.71 | 2.31 | 0.87 |
| 38 | 136.8 | 2.038 | 1.42 | 259.96 | 8.5  | 537.25 | 49   | 13.68 | 0.53 | 4.28 | 1.16  | 8.12  | 2.74 | 0.75 |
| 39 | 136.5 | 1.891 | 1.36 | 343.04 | 9.2  | 573.65 | 49.6 | 13.73 | 0.43 | 3.48 | 1.1   | 7.98  | 2.19 | 0.87 |
| 40 | 136.4 | 2.19  | 1.57 | 254.6  | 8.9  | 543.89 | 49.6 | 13.57 | 0.53 | 4.32 | 1.13  | 10.72 | 2.37 | 0.84 |
| 41 | 136.1 | 2.237 | 1.34 | 354.74 | 8.9  | 657.94 | 50.2 | 13.56 | 0.43 | 3.47 | 1.14  | 10.73 | 2.37 | 0.75 |
| 42 | 134.8 | 2.012 | 1.58 | 375.46 | 10.2 | 696.58 | 52.7 | 14.58 | 0.52 | 4.28 | 0.85  | 10.14 | 2.75 | 0.75 |
| 43 | 134.7 | 1.76  | 1.27 | 385.8  | 8.2  | 633.45 | 52.8 | 15.27 | 0.36 | 3.16 | 1.24  | 8.12  | 2.85 | 0.75 |
| 44 | 134.5 | 1.78  | 1.38 | 324.56 | 7.5  | 543.2  | 54.1 | 14.74 | 0.37 | 3.16 | 1.3   | 10.75 | 3.29 | 0.69 |
| 45 | 134.5 | 1.87  | 1.35 | 348.67 | 8.5  | 654.13 | 52.4 | 14.69 | 0.34 | 2.98 | 1.19  | 10.81 | 2.96 | 0.74 |
| 46 | 134.2 | 2.03  | 1.35 | 347.85 | 9.6  | 538.98 | 47.5 | 15.37 | 0.54 | 4.32 | 1.35  | 8.11  | 3.57 | 0.66 |
| 47 | 172.5 | 1.97  | 1.53 | 340.36 | 8.8  | 682.43 | 53.4 | 14.65 | 0.34 | 3.08 | 1.15  | 8.18  | 3.14 | 0.73 |
| 48 | 132.4 | 1.935 | 1.32 | 357.64 | 7.6  | 698.76 | 52.9 | 15.02 | 0.25 | 2.46 | 1.26  | 8.26  | 2.16 | 0.92 |
| 49 | 132.4 | 1.621 | 1.54 | 257.87 | 7.6  | 534.4  | 49.8 | 14.98 | 0.25 | 2.46 | 1.26  | 8.26  | 2.18 | 0.89 |
| 50 | 132   | 1.95  | 1.28 | 249.24 | 9.3  | 521.92 | 45.6 | 14.85 | 0.55 | 4.55 | 1.02  | 8.37  | 3.46 | 0.68 |
| 51 | 131.2 | 1.942 | 1.28 | 368.74 | 9.3  | 685.95 | 52.4 | 14.85 | 0.58 | 4.73 | 1.02  | 8.37  | 3.46 | 0.68 |
| 52 | 129.8 | 1.935 | 1.32 | 358.6  | 8.4  | 785.45 | 50.3 | 15.31 | 0.3  | 2.76 | 1.2   | 8.38  | 3.47 | 0.68 |
| 53 | 129.8 | 1.692 | 1.37 | 328.3  | 7.6  | 625.69 | 50.8 | 15.27 | 0.54 | 4.37 | 1.27  | 8.76  | 3.15 | 0.73 |
| 54 | 128.6 | 1.577 | 1.26 | 387.4  | 7.6  | 581.21 | 53.1 | 15.24 | 0.54 | 4.4  | 1.27  | 8.92  | 3.16 | 0.72 |

|    |       |       |      |        |     |        |      |       |      |      |      |       |      |      |
|----|-------|-------|------|--------|-----|--------|------|-------|------|------|------|-------|------|------|
| 55 | 128.6 | 1.76  | 1.26 | 387.6  | 7.6 | 585.56 | 52.9 | 15.04 | 0.64 | 4.87 | 1.27 | 8.93  | 3.21 | 0.72 |
| 56 | 128.3 | 1.628 | 1.37 | 332.32 | 7.4 | 594.38 | 53.4 | 14.35 | 0.57 | 4.58 | 1.34 | 10.15 | 3.27 | 0.7  |
| 57 | 127.8 | 1.84  | 1.28 | 254.7  | 7.3 | 584.47 | 44.2 | 14.33 | 0.67 | 5.14 | 0.93 | 10.26 | 3.28 | 0.7  |
| 58 | 126.5 | 1.692 | 1.24 | 392.9  | 8.2 | 587.69 | 51.8 | 14.37 | 0.67 | 5.12 | 1.24 | 10.11 | 2.98 | 0.74 |
| 59 | 126.5 | 1.75  | 1.24 | 393.69 | 8.2 | 632.12 | 52.5 | 14.36 | 0.31 | 2.84 | 1.25 | 10.11 | 2.98 | 0.74 |
| 60 | 125.9 | 1.57  | 1.41 | 315.2  | 7.6 | 637.25 | 50.7 | 14.25 | 0.38 | 3.27 | 1.28 | 9.42  | 3.25 | 0.72 |
| 61 | 125.6 | 1.61  | 1.39 | 321    | 7.6 | 647.6  | 54.2 | 14.25 | 0.61 | 4.86 | 1.29 | 9.42  | 3.26 | 0.72 |
| 62 | 125.6 | 1.737 | 1.39 | 324.28 | 7.5 | 713.43 | 51.6 | 12.48 | 0.65 | 5.12 | 1.3  | 9.45  | 2.95 | 0.74 |
| 63 | 124.9 | 1.85  | 1.14 | 398.8  | 7.5 | 589.45 | 50.1 | 14.62 | 0.45 | 3.51 | 1.31 | 9.48  | 2.94 | 0.88 |
| 64 | 123.3 | 1.94  | 1.29 | 364.2  | 8.2 | 594.27 | 49.5 | 13.48 | 0.35 | 3.12 | 1.39 | 9.26  | 3.48 | 0.68 |
| 65 | 119.2 | 1.801 | 1.37 | 247.15 | 6.9 | 614.95 | 45.8 | 15.63 | 0.41 | 3.43 | 1.38 | 9.12  | 3.21 | 0.98 |
| 66 | 115.7 | 1.432 | 1.41 | 310.88 | 6.7 | 683.45 | 54.6 | 12.87 | 0.48 | 3.84 | 1.38 | 8.93  | 3.54 | 0.67 |
| 67 | 114.6 | 1.577 | 1.45 | 214.4  | 5.9 | 695.32 | 52.1 | 13.74 | 0.75 | 5.64 | 1.5  | 10.63 | 4.37 | 0.52 |
| 68 | 113.6 | 1.76  | 1.27 | 386.5  | 6.6 | 638.33 | 46.9 | 13.58 | 0.52 | 4.16 | 1.24 | 8.29  | 3.31 | 0.69 |
| 69 | 113.5 | 1.75  | 1.36 | 342.12 | 6.6 | 714.28 | 52.1 | 13.57 | 0.38 | 3.24 | 1.39 | 8.32  | 4.33 | 0.53 |
| 70 | 113.5 | 1.64  | 1.46 | 290.5  | 6.8 | 615.75 | 48.9 | 12.76 | 0.64 | 4.87 | 1.38 | 8.45  | 3.64 | 0.65 |
| 71 | 113.2 | 1.62  | 1.37 | 340.36 | 6.5 | 643.28 | 52.6 | 13.23 | 0.74 | 5.62 | 1.41 | 9.03  | 4.36 | 0.74 |

**Table G. Biochemical parameters of newly diagnosed (ND) RA patients**

|   | ROS<br>(% of<br>control) | MDA<br>(nmol/ml) | Carbonyl<br>(nmoles/mg<br>protein) | T-SH<br>( $\mu$ M) | Tail<br>length<br>( $\mu$ m) | FRAP<br>( $\mu$ M) | %<br>quenching<br>of DPPH | NO<br>( $\mu$ M) | VITC<br>(mg/dl) | GSH<br>(nmoles/mg<br>Hb) | SOD<br>(U/mg<br>Hb) | Catalase<br>(U/mg<br>Hb) | GR<br>(U/g<br>Hb) | GST<br>(U/mg<br>Hb) |
|---|--------------------------|------------------|------------------------------------|--------------------|------------------------------|--------------------|---------------------------|------------------|-----------------|--------------------------|---------------------|--------------------------|-------------------|---------------------|
| 1 | 133.6                    | 2.54             | 1.54                               | 324.17             | 7.6                          | 515.9              | 45.6                      | 12.85            | 0.31            | 2.04                     | 0.7                 | 9.14                     | 2.13              | 0.5                 |
| 2 | 164.5                    | 1.993            | 1.49                               | 302.6              | 9.5                          | 564.32             | 48.5                      | 12.85            | 0.3             | 2.78                     | 0.94                | 7.29                     | 2.64              | 0.72                |
| 3 | 164.3                    | 1.801            | 1.48                               | 278.72             | 9.5                          | 614.95             | 50                        | 14.8             | 0.26            | 2.61                     | 0.95                | 9.87                     | 2.38              | 0.68                |
| 4 | 151.3                    | 1.935            | 1.49                               | 275.14             | 9.4                          | 628.56             | 52.4                      | 14.76            | 0.5             | 3.85                     | 0.96                | 8.48                     | 2.43              | 0.54                |
| 5 | 159.6                    | 2.32             | 1.47                               | 286.75             | 8.4                          | 568.14             | 46.7                      | 14.83            | 0.29            | 2.73                     | 1.2                 | 7.24                     | 0.54              | 0.76                |

|    |       |       |      |        |      |        |      |       |      |      |      |       |      |      |
|----|-------|-------|------|--------|------|--------|------|-------|------|------|------|-------|------|------|
| 6  | 158.9 | 2.179 | 1.38 | 292.12 | 8.3  | 543.87 | 49.6 | 14.75 | 0.23 | 2.34 | 1.21 | 7.2   | 2.35 | 0.85 |
| 7  | 158.9 | 1.391 | 1.42 | 276.2  | 8.6  | 593.22 | 53.4 | 14.75 | 0.14 | 4.85 | 1.16 | 7.63  | 3.12 | 0.52 |
| 8  | 162.9 | 2.12  | 1.51 | 268.31 | 11.3 | 632.25 | 50.6 | 14.74 | 0.24 | 2.38 | 0.74 | 8.67  | 3.13 | 0.74 |
| 9  | 154.8 | 2.179 | 1.41 | 265.46 | 8.1  | 650.86 | 52.6 | 15.81 | 0.61 | 2.79 | 1.25 | 7.34  | 3.17 | 0.97 |
| 10 | 154.3 | 2.05  | 1.43 | 297.48 | 8.2  | 648.92 | 49.8 | 14.37 | 0.43 | 3.46 | 1.24 | 9.34  | 2.96 | 0.74 |
| 11 | 152.3 | 1.57  | 1.42 | 304.53 | 7.6  | 654.32 | 52.7 | 14.24 | 0.26 | 2.58 | 1.29 | 9.53  | 3.49 | 0.83 |
| 12 | 148.5 | 1.28  | 1.37 | 329.64 | 11.8 | 628.48 | 54.2 | 13.62 | 0.36 | 3.13 | 1.3  | 9.22  | 4.13 | 0.82 |
| 13 | 147.5 | 2.038 | 1.37 | 268    | 9.8  | 638.64 | 50.8 | 13.67 | 0.32 | 2.84 | 0.9  | 7.1   | 3.26 | 0.72 |
| 14 | 145.6 | 1.62  | 1.31 | 359.78 | 8.3  | 647.6  | 55.2 | 15.62 | 0.57 | 4.57 | 1.23 | 8.37  | 4.83 | 0.79 |
| 15 | 142.6 | 2.06  | 1.28 | 365.64 | 10.6 | 607.98 | 49.5 | 13.28 | 0.32 | 2.94 | 0.82 | 7.54  | 2.67 | 1.06 |
| 16 | 142.5 | 2.05  | 1.37 | 332.32 | 8.3  | 568.14 | 48.5 | 15.7  | 0.26 | 2.64 | 1.22 | 7.64  | 3.76 | 0.64 |
| 17 | 142.3 | 1.93  | 1.57 | 375.42 | 10.5 | 616.03 | 53.1 | 14.84 | 0.28 | 2.71 | 0.83 | 7.41  | 2.45 | 0.81 |
| 18 | 138.4 | 1.929 | 1.39 | 321.6  | 6.5  | 626.92 | 52.6 | 14.46 | 0.28 | 2.65 | 1.39 | 9.63  | 2.15 | 0.95 |
| 19 | 137.2 | 1.46  | 1.39 | 395.6  | 7.7  | 657.89 | 54.8 | 13.36 | 0.47 | 3.62 | 1.26 | 9.38  | 2.29 | 0.87 |
| 20 | 136.9 | 1.891 | 1.21 | 304.15 | 7.7  | 639.03 | 52.8 | 13.29 | 0.51 | 3.95 | 1.26 | 10.71 | 2.31 | 0.87 |
| 21 | 135   | 1.243 | 1.43 | 298.7  | 7.6  | 703.73 | 56.2 | 13.28 | 0.58 | 4.73 | 1.28 | 10.28 | 4.73 | 0.74 |
| 22 | 134.8 | 2.012 | 1.58 | 375.46 | 10.2 | 696.58 | 52.7 | 14.58 | 0.52 | 4.28 | 0.85 | 10.14 | 2.75 | 0.75 |
| 23 | 134.5 | 1.78  | 1.38 | 324.56 | 7.5  | 543.2  | 54.1 | 14.74 | 0.37 | 3.16 | 1.3  | 10.75 | 3.29 | 0.69 |
| 24 | 134.2 | 1.467 | 1.34 | 353.95 | 7.3  | 719.29 | 54.9 | 13.49 | 0.57 | 4.64 | 1.35 | 8.25  | 3.12 | 0.52 |
| 25 | 134.1 | 1.544 | 1.37 | 332.32 | 7.4  | 687.68 | 54.7 | 12.79 | 0.59 | 4.83 | 1.34 | 9.74  | 4.12 | 0.57 |
| 26 | 132.6 | 1.243 | 1.27 | 376.8  | 7.9  | 728.27 | 52.8 | 13.27 | 0.59 | 4.78 | 1.26 | 10.54 | 4.25 | 0.54 |
| 27 | 132.5 | 1.24  | 1.28 | 376.5  | 7.9  | 602.97 | 53.7 | 13.24 | 0.59 | 4.8  | 1.26 | 8.66  | 4.32 | 0.53 |
| 28 | 132.4 | 1.935 | 1.32 | 357.64 | 7.6  | 698.76 | 52.9 | 15.02 | 0.25 | 2.46 | 1.26 | 8.26  | 2.16 | 0.92 |
| 29 | 132.4 | 1.621 | 1.54 | 257.87 | 7.6  | 534.4  | 49.8 | 14.98 | 0.25 | 2.46 | 1.26 | 8.26  | 2.18 | 0.89 |
| 30 | 131.2 | 1.942 | 1.28 | 368.74 | 9.3  | 685.95 | 52.4 | 14.85 | 0.58 | 4.73 | 1.02 | 8.37  | 3.46 | 0.68 |
| 31 | 129.8 | 1.21  | 1.28 | 376.8  | 7.2  | 687.98 | 54.8 | 14.54 | 0.64 | 4.96 | 1.38 | 8.14  | 2.67 | 0.75 |
| 32 | 128.3 | 1.628 | 1.37 | 332.32 | 7.4  | 594.38 | 53.4 | 14.35 | 0.57 | 4.58 | 1.34 | 10.15 | 3.27 | 0.7  |
| 33 | 126.9 | 1.256 | 1.28 | 376.8  | 7.3  | 734.67 | 56.4 | 13.21 | 0.73 | 5.48 | 1.36 | 8.14  | 3.63 | 0.65 |
| 34 | 125.9 | 1.57  | 1.41 | 315.2  | 7.6  | 637.25 | 50.7 | 14.25 | 0.38 | 3.27 | 1.28 | 9.42  | 3.25 | 0.72 |

|    |       |       |      |        |     |        |      |       |      |      |      |       |      |      |
|----|-------|-------|------|--------|-----|--------|------|-------|------|------|------|-------|------|------|
| 35 | 125.6 | 1.61  | 1.39 | 321    | 7.6 | 647.6  | 54.2 | 14.25 | 0.61 | 4.86 | 1.29 | 9.42  | 3.26 | 0.72 |
| 36 | 125.6 | 1.737 | 1.39 | 324.28 | 7.5 | 713.43 | 51.6 | 12.48 | 0.65 | 5.12 | 1.3  | 9.45  | 2.95 | 0.74 |
| 37 | 124.9 | 1.23  | 1.57 | 254.6  | 7.2 | 649.76 | 52.8 | 14.84 | 0.68 | 5.25 | 1.38 | 8.98  | 3.82 | 0.64 |
| 38 | 124.8 | 1.339 | 1.27 | 380.98 | 7.2 | 684.57 | 55.5 | 14.56 | 0.71 | 5.27 | 1.38 | 9.15  | 3.85 | 0.63 |
| 39 | 124.3 | 1.628 | 1.26 | 387.9  | 5.9 | 721.23 | 56.4 | 14.36 | 0.72 | 5.39 | 1.5  | 9.16  | 3.87 | 0.62 |
| 40 | 123.5 | 1.43  | 1.25 | 388.6  | 5.8 | 756.8  | 53.4 | 12.65 | 0.72 | 5.42 | 1.54 | 9.18  | 3.94 | 0.62 |
| 41 | 123.4 | 1.342 | 1.25 | 389.5  | 5.6 | 673.25 | 55.1 | 12.56 | 0.72 | 5.43 | 1.54 | 9.21  | 3.85 | 0.62 |
| 42 | 121.3 | 1.265 | 1.19 | 397.9  | 6.3 | 704.56 | 55.2 | 12.87 | 0.67 | 5.18 | 1.43 | 9.37  | 4.03 | 0.58 |
| 43 | 120.6 | 1.27  | 1.18 | 398.4  | 6.2 | 768.34 | 55.6 | 12.85 | 0.67 | 5.2  | 1.45 | 9.37  | 4.05 | 0.57 |
| 44 | 120.5 | 1.32  | 1.27 | 398.6  | 5.9 | 674.35 | 55.6 | 12.85 | 0.72 | 5.45 | 1.47 | 8.27  | 4.12 | 0.57 |
| 45 | 119.5 | 1.83  | 1.48 | 284.08 | 9.2 | 612.37 | 56.5 | 14.27 | 0.66 | 5.12 | 1.11 | 8.32  | 3.49 | 0.68 |
| 46 | 116.8 | 1.358 | 1.28 | 368.7  | 5.3 | 797.97 | 56.7 | 13.46 | 0.42 | 3.45 | 1.64 | 8.28  | 3.49 | 0.67 |
| 47 | 116.2 | 1.37  | 1.28 | 376.43 | 5.2 | 699.76 | 54.7 | 13.46 | 0.47 | 3.83 | 1.83 | 8.29  | 3.52 | 0.67 |
| 48 | 115.7 | 1.432 | 1.41 | 310.88 | 6.7 | 683.45 | 54.6 | 12.87 | 0.48 | 3.84 | 1.38 | 8.93  | 3.54 | 0.67 |
| 49 | 115.6 | 1.467 | 1.27 | 376.9  | 5.6 | 759.98 | 58.5 | 14.83 | 0.76 | 5.67 | 1.57 | 8.93  | 3.65 | 0.64 |
| 50 | 115.4 | 1.324 | 1.33 | 385.48 | 5.4 | 698.35 | 54.2 | 14.95 | 0.76 | 5.71 | 1.58 | 8.94  | 3.67 | 0.64 |
| 51 | 115.3 | 1.76  | 1.23 | 395.47 | 5.9 | 685.67 | 53.8 | 13.46 | 0.78 | 5.73 | 1.49 | 10.38 | 3.68 | 0.64 |
| 52 | 114.6 | 1.577 | 1.45 | 214.4  | 5.9 | 695.32 | 52.1 | 13.74 | 0.75 | 5.64 | 1.5  | 10.63 | 4.37 | 0.52 |
| 53 | 113.2 | 1.23  | 1.17 | 296.5  | 5.3 | 788.9  | 52.7 | 13.74 | 0.81 | 5.82 | 1.61 | 7.47  | 4.37 | 0.87 |

**Table H. Biochemical parameters of RA patients with  $\leq 2$  Years of disease duration**

|   | <b>ROS<br/>(% of control)</b> | <b>MDA<br/>(nmol/ml)</b> | <b>Carbonyl<br/>(nmoles/mg protein)</b> | <b>T-SH<br/>(<math>\mu</math>M)</b> | <b>Tail length<br/>(<math>\mu</math>m)</b> | <b>FRAP<br/>(<math>\mu</math>M)</b> | <b>% quenching<br/>of DPPH</b> | <b>NO<br/>(<math>\mu</math>M)</b> | <b>VITC<br/>(mg/dl)</b> | <b>GSH<br/>(nmoles/mg Hb)</b> | <b>SOD<br/>(U/mg Hb)</b> | <b>Catalase<br/>(U/mg Hb)</b> | <b>GR<br/>(U/g Hb)</b> | <b>GST<br/>(U/mg Hb)</b> |
|---|-------------------------------|--------------------------|-----------------------------------------|-------------------------------------|--------------------------------------------|-------------------------------------|--------------------------------|-----------------------------------|-------------------------|-------------------------------|--------------------------|-------------------------------|------------------------|--------------------------|
| 1 | 164.8                         | 2.621                    | 1.53                                    | 262.64                              | 11.3                                       | 526.79                              | 45.8                           | 15.04                             | 0.57                    | 4.56                          | 0.78                     | 7.94                          | 2.15                   | 0.95                     |
| 2 | 163.2                         | 2                        | 1.59                                    | 280.4                               | 9.4                                        | 557.25                              | 47.28                          | 14.76                             | 0.31                    | 2.84                          | 0.95                     | 8.47                          | 2.43                   | 0.83                     |
| 3 | 162.3                         | 2.224                    | 1.48                                    | 278.75                              | 10.3                                       | 594.58                              | 51                             | 14.83                             | 0.33                    | 2.97                          | 0.84                     | 7.83                          | 2.43                   | 0.81                     |
| 4 | 154.9                         | 2.57                     | 1.41                                    | 312.5                               | 8.5                                        | 553.99                              | 48.2                           | 14.85                             | 0.21                    | 2.17                          | 1.18                     | 9.28                          | 2.6                    | 0.79                     |

|    |       |       |      |        |      |        |      |       |      |      |       |       |      |      |
|----|-------|-------|------|--------|------|--------|------|-------|------|------|-------|-------|------|------|
| 5  | 154.6 | 2.17  | 1.4  | 315.47 | 9.5  | 612.38 | 49.2 | 14.95 | 0.33 | 2.97 | 0.94  | 9.32  | 2.67 | 0.77 |
| 6  | 153.1 | 1.987 | 1.58 | 254.15 | 9.6  | 510.46 | 46.2 | 15.28 | 0.47 | 3.68 | 0.93  | 8.29  | 3.06 | 0.74 |
| 7  | 152.3 | 2.57  | 1.48 | 278.49 | 9.5  | 535.08 | 50.5 | 14.87 | 0.34 | 3.04 | 0.94  | 10.92 | 3.28 | 0.69 |
| 8  | 149.2 | 2.038 | 1.49 | 276.8  | 10.3 | 514.81 | 47.6 | 15.05 | 0.4  | 3.38 | 0.85  | 9.72  | 3.42 | 0.69 |
| 9  | 148.7 | 2.57  | 1.5  | 269.8  | 9.6  | 588.82 | 49.2 | 14.85 | 0.39 | 3.28 | 0.94  | 8.28  | 3.43 | 0.69 |
| 10 | 148.7 | 2.37  | 1.49 | 273.7  | 9.6  | 537.68 | 48.9 | 14.85 | 0.37 | 3.18 | 0.94  | 8.29  | 3.43 | 0.68 |
| 11 | 148.6 | 1.935 | 1.46 | 286.76 | 8.5  | 518.08 | 47.3 | 14.37 | 0.41 | 3.43 | 1.18  | 8.29  | 3.46 | 0.68 |
| 12 | 147.8 | 1.98  | 1.46 | 287.14 | 7.5  | 612.87 | 49.8 | 14.38 | 0.39 | 3.38 | 1.32  | 7.17  | 3.47 | 0.68 |
| 13 | 147.5 | 2.179 | 1.64 | 234.1  | 8.9  | 581.21 | 48.4 | 14.38 | 0.29 | 2.74 | 1.14  | 7.37  | 4.03 | 0.58 |
| 14 | 146.8 | 1.325 | 1.37 | 327.9  | 9.2  | 582.39 | 52.9 | 13.63 | 0.34 | 3.12 | 1.105 | 7.39  | 2.76 | 0.75 |
| 15 | 143.8 | 2.391 | 1.63 | 246.24 | 9.3  | 551.82 | 47.2 | 13.84 | 0.45 | 3.54 | 1.03  | 10.82 | 2.66 | 0.78 |
| 16 | 143.3 | 1.801 | 1.48 | 356.42 | 9.1  | 590.76 | 47.6 | 13.56 | 0.48 | 3.84 | 1.12  | 7.18  | 2.37 | 0.84 |
| 17 | 142.5 | 1.621 | 1.32 | 358.9  | 9.4  | 564.32 | 52.8 | 14.27 | 0.52 | 4.23 | 0.98  | 8.42  | 2.36 | 0.84 |
| 18 | 142.5 | 2.13  | 1.38 | 324.53 | 8.3  | 574.37 | 49.8 | 14.3  | 0.27 | 2.64 | 1.224 | 7.68  | 3.78 | 0.64 |
| 19 | 142.3 | 2.134 | 1.54 | 262.64 | 9.2  | 555.08 | 50.5 | 15.03 | 0.41 | 3.42 | 1.08  | 7.93  | 2.19 | 0.53 |
| 20 | 137.5 | 1.5   | 1.45 | 292.12 | 8.6  | 635.63 | 53.5 | 13.74 | 0.54 | 4.52 | 1.16  | 7.94  | 2.15 | 0.94 |
| 21 | 136.5 | 1.891 | 1.36 | 343.04 | 9.2  | 573.65 | 49.6 | 13.73 | 0.43 | 3.48 | 1.1   | 7.98  | 2.19 | 0.87 |
| 22 | 134.7 | 1.76  | 1.27 | 385.8  | 8.2  | 633.45 | 52.8 | 15.27 | 0.36 | 3.16 | 1.24  | 8.12  | 2.85 | 0.75 |
| 23 | 134.5 | 1.87  | 1.35 | 348.67 | 8.5  | 654.13 | 52.4 | 14.69 | 0.34 | 2.98 | 1.19  | 10.81 | 2.96 | 0.74 |
| 24 | 134.2 | 1.737 | 1.52 | 267.15 | 8.8  | 707.89 | 52.1 | 13.52 | 0.51 | 3.92 | 1.15  | 8.19  | 2.64 | 0.79 |
| 25 | 129.8 | 1.935 | 1.32 | 358.6  | 8.4  | 785.45 | 50.3 | 15.31 | 0.3  | 2.76 | 1.2   | 8.38  | 3.47 | 0.68 |
| 26 | 129.8 | 1.692 | 1.37 | 328.3  | 7.6  | 625.69 | 50.8 | 15.27 | 0.54 | 4.37 | 1.27  | 8.76  | 3.15 | 0.73 |
| 27 | 128.6 | 1.577 | 1.26 | 387.4  | 7.6  | 581.21 | 53.1 | 15.24 | 0.54 | 4.4  | 1.27  | 8.92  | 3.16 | 0.72 |
| 28 | 128.6 | 1.76  | 1.26 | 387.6  | 7.6  | 585.56 | 52.9 | 15.04 | 0.64 | 4.87 | 1.27  | 8.93  | 3.21 | 0.72 |
| 29 | 126.5 | 1.692 | 1.24 | 392.9  | 8.2  | 587.69 | 51.8 | 14.37 | 0.67 | 5.12 | 1.24  | 10.11 | 2.98 | 0.74 |
| 30 | 126.5 | 1.75  | 1.24 | 393.69 | 8.2  | 632.12 | 52.5 | 14.36 | 0.31 | 2.84 | 1.25  | 10.11 | 2.98 | 0.74 |
| 31 | 126.4 | 1.54  | 1.51 | 269.5  | 8.9  | 615.7  | 52.6 | 12.43 | 0.64 | 4.91 | 1.15  | 8.56  | 3.12 | 0.74 |
| 32 | 124.9 | 1.85  | 1.14 | 398.8  | 7.5  | 589.45 | 50.1 | 14.62 | 0.45 | 3.51 | 1.31  | 9.48  | 2.94 | 0.88 |
| 33 | 123.4 | 1.54  | 1.47 | 286.2  | 8.5  | 612.77 | 55.2 | 14.28 | 0.6  | 4.83 | 1.18  | 8.26  | 2.95 | 0.74 |

|    |       |      |      |        |     |        |      |       |      |      |      |      |      |      |
|----|-------|------|------|--------|-----|--------|------|-------|------|------|------|------|------|------|
| 34 | 123.3 | 1.94 | 1.29 | 364.2  | 8.2 | 594.27 | 49.5 | 13.48 | 0.35 | 3.12 | 1.39 | 9.26 | 3.48 | 0.68 |
| 35 | 120   | 1.54 | 1.33 | 248.31 | 8.2 | 647.6  | 53.5 | 13.54 | 0.53 | 4.28 | 1.24 | 9.4  | 4.13 | 0.54 |
| 36 | 115.3 | 1.57 | 0.6  | 410.2  | 6.4 | 635.63 | 50.9 | 13.75 | 0.67 | 5.13 | 1.43 | 9.98 | 3.59 | 0.65 |
| 37 | 113.6 | 1.76 | 1.27 | 386.5  | 6.6 | 638.33 | 46.9 | 13.58 | 0.52 | 4.16 | 1.24 | 8.29 | 3.31 | 0.69 |
| 38 | 113.5 | 1.75 | 1.36 | 342.12 | 6.6 | 714.28 | 52.1 | 13.57 | 0.38 | 3.24 | 1.39 | 8.32 | 4.33 | 0.53 |
| 39 | 113.2 | 1.62 | 1.37 | 340.36 | 6.5 | 643.28 | 52.6 | 13.23 | 0.74 | 5.62 | 1.41 | 9.03 | 4.36 | 0.74 |

**Table I. Biochemical parameters of RA patients with 2-5 years of disease duration**

|    | <b>ROS<br/>(% of control)</b> | <b>MDA<br/>(nmol/ml)</b> | <b>Carbonyl<br/>(nmoles/mg protein)</b> | <b>T-SH<br/>(<math>\mu</math>M)</b> | <b>Tail length<br/>(<math>\mu</math>m)</b> | <b>FRAP<br/>(<math>\mu</math>M)</b> | <b>% quenching<br/>of DPPH</b> | <b>NO<br/>(<math>\mu</math>M)</b> | <b>VITC<br/>(mg/dl)</b> | <b>GSH<br/>(nmoles/mg Hb)</b> | <b>SOD<br/>(U/mg Hb)</b> | <b>Catalase<br/>(U/mg Hb)</b> | <b>GR<br/>(U/g Hb)</b> | <b>GST<br/>(U/mg Hb)</b> |
|----|-------------------------------|--------------------------|-----------------------------------------|-------------------------------------|--------------------------------------------|-------------------------------------|--------------------------------|-----------------------------------|-------------------------|-------------------------------|--------------------------|-------------------------------|------------------------|--------------------------|
| 1  | 168.4                         | 2.76                     | 1.59                                    | 248.6                               | 11.6                                       | 502.84                              | 45.8                           | 15.57                             | 0.53                    | 4.28                          | 0.72                     | 7.34                          | 2.35                   | 0.85                     |
| 2  | 168.3                         | 2.692                    | 1.59                                    | 247.9                               | 11.6                                       | 506.1                               | 43.5                           | 12.68                             | 0.54                    | 4.38                          | 0.72                     | 9.21                          | 2.09                   | 0.99                     |
| 3  | 161.2                         | 2.73                     | 1.55                                    | 256.3                               | 9.5                                        | 539.3                               | 46.2                           | 15.84                             | 0.21                    | 2.12                          | 0.94                     | 8.74                          | 2.36                   | 0.84                     |
| 4  | 158.9                         | 2.692                    | 1.5                                     | 270.68                              | 12.6                                       | 504.54                              | 48.6                           | 15.86                             | 0.24                    | 2.37                          | 0.67                     | 9.64                          | 2.29                   | 0.87                     |
| 5  | 154.7                         | 2.198                    | 1.64                                    | 324.28                              | 11.6                                       | 538.24                              | 45.8                           | 15.43                             | 0.28                    | 2.69                          | 0.74                     | 9.28                          | 2.67                   | 0.78                     |
| 6  | 153.4                         | 1.801                    | 1.52                                    | 312.54                              | 10                                         | 672.62                              | 48.2                           | 15.64                             | 0.24                    | 2.43                          | 0.87                     | 7.31                          | 3.24                   | 0.72                     |
| 7  | 158.7                         | 2.583                    | 1.59                                    | 247.32                              | 11.2                                       | 513.72                              | 46.9                           | 15.08                             | 0.25                    | 2.46                          | 0.81                     | 7.06                          | 3.34                   | 0.69                     |
| 8  | 147.2                         | 2.403                    | 1.52                                    | 337.68                              | 10.6                                       | 533.32                              | 47.8                           | 14.25                             | 0.21                    | 2.12                          | 0.83                     | 7.63                          | 2.12                   | 0.72                     |
| 9  | 146.9                         | 2.435                    | 1.47                                    | 284.63                              | 10.6                                       | 561.61                              | 46.8                           | 14.21                             | 0.21                    | 2.15                          | 0.83                     | 7.63                          | 2.12                   | 0.97                     |
| 10 | 146.9                         | 2.18                     | 1.36                                    | 343.34                              | 10.5                                       | 631.02                              | 50.2                           | 13.75                             | 0.34                    | 3.08                          | 0.83                     | 7.38                          | 3.65                   | 0.64                     |
| 11 | 145.2                         | 2.435                    | 1.39                                    | 322.8                               | 10.8                                       | 568.34                              | 48.6                           | 14.76                             | 0.34                    | 3.12                          | 0.81                     | 9.27                          | 2.67                   | 0.84                     |
| 12 | 143.5                         | 2.403                    | 1.38                                    | 324.4                               | 9.6                                        | 568.37                              | 46.9                           | 13.84                             | 0.46                    | 3.57                          | 0.91                     | 7.05                          | 2.67                   | 0.78                     |
| 13 | 143.5                         | 2.378                    | 1.28                                    | 367.8                               | 9.6                                        | 535.49                              | 48.7                           | 13.82                             | 0.47                    | 3.62                          | 0.93                     | 11.28                         | 2.67                   | 0.78                     |
| 14 | 142.8                         | 2.378                    | 1.37                                    | 334.2                               | 10.7                                       | 563.58                              | 48.6                           | 13.28                             | 0.38                    | 3.27                          | 0.82                     | 7.53                          | 4.16                   | 0.54                     |
| 15 | 142.3                         | 2.15                     | 1.62                                    | 265.32                              | 10.5                                       | 559.44                              | 45.2                           | 14.84                             | 0.29                    | 2.72                          | 0.84                     | 7.47                          | 2.56                   | 0.79                     |
| 16 | 141.6                         | 2.237                    | 1.42                                    | 305.9                               | 9.4                                        | 528.92                              | 48.2                           | 14.49                             | 0.23                    | 2.35                          | 0.97                     | 9.62                          | 2.13                   | 0.97                     |
| 17 | 136.8                         | 2.038                    | 1.42                                    | 259.96                              | 8.5                                        | 537.25                              | 49                             | 13.68                             | 0.53                    | 4.28                          | 1.16                     | 8.12                          | 2.74                   | 0.75                     |

|    |       |       |      |        |     |        |      |       |      |      |      |       |      |      |
|----|-------|-------|------|--------|-----|--------|------|-------|------|------|------|-------|------|------|
| 18 | 136.4 | 2.19  | 1.57 | 254.6  | 8.9 | 543.89 | 49.6 | 13.57 | 0.53 | 4.32 | 1.13 | 10.72 | 2.37 | 0.84 |
| 19 | 136.1 | 2.237 | 1.34 | 354.74 | 8.9 | 657.94 | 50.2 | 13.56 | 0.43 | 3.47 | 1.14 | 10.73 | 2.37 | 0.75 |
| 20 | 134.2 | 2.03  | 1.35 | 347.85 | 9.6 | 538.98 | 47.5 | 15.37 | 0.54 | 4.32 | 1.35 | 8.11  | 3.57 | 0.66 |
| 21 | 172.5 | 1.97  | 1.53 | 340.36 | 8.8 | 682.43 | 53.4 | 14.65 | 0.34 | 3.08 | 1.15 | 8.18  | 3.14 | 0.73 |
| 22 | 133.1 | 1.467 | 1.37 | 334.8  | 8.8 | 648.96 | 50.9 | 14.63 | 0.53 | 4.32 | 1.16 | 10.52 | 3.53 | 0.67 |
| 23 | 132   | 1.95  | 1.28 | 249.24 | 9.3 | 521.92 | 45.6 | 14.85 | 0.55 | 4.55 | 1.02 | 8.37  | 3.46 | 0.68 |
| 24 | 127.8 | 1.84  | 1.28 | 254.7  | 7.3 | 584.47 | 44.2 | 14.33 | 0.67 | 5.14 | 0.93 | 10.26 | 3.28 | 0.7  |
| 25 | 126.3 | 1.487 | 1.28 | 367.24 | 9.9 | 684.25 | 52.8 | 12.38 | 0.64 | 4.92 | 0.87 | 8.16  | 2.27 | 0.74 |
| 26 | 124.5 | 1.27  | 1.44 | 354.87 | 9.2 | 593.18 | 54.8 | 14.36 | 0.71 | 5.29 | 1.06 | 9.16  | 3.95 | 0.59 |
| 27 | 119.2 | 1.801 | 1.37 | 247.15 | 6.9 | 614.95 | 45.8 | 15.63 | 0.41 | 3.43 | 1.38 | 9.12  | 3.21 | 0.98 |
| 28 | 113.5 | 1.64  | 1.46 | 290.5  | 6.8 | 615.75 | 48.9 | 12.76 | 0.64 | 4.87 | 1.38 | 8.45  | 3.64 | 0.65 |
